# Supplementary material for: Lean thinking in hospitals: is there a cure for the absence of evidence? A systematic review of reviews
Source: PubMed Central journal article supplement — BMJ Open. 2014 Jan 15;4(1):e003873. doi: 10.1136/bmjopen-2013-003873 (PMC3902334; doi:10.1136/bmjopen-2013-003873), 2014-01-15
Supplement: bmjopen-2013-003873.draft_revisions.pdf [file bmjopen-2013-003873.draft_revisions.pdf]

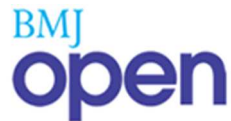

**Lean thinking in hospitals: Is there a cure for the absence of evidence?  
A systematic review of reviews**

|                                 |                                                                                                                                                                                                                                                                                                                                                                                                                                                                                                                                                                             |
|---------------------------------|-----------------------------------------------------------------------------------------------------------------------------------------------------------------------------------------------------------------------------------------------------------------------------------------------------------------------------------------------------------------------------------------------------------------------------------------------------------------------------------------------------------------------------------------------------------------------------|
| Journal:                        | <i>BMJ Open</i>                                                                                                                                                                                                                                                                                                                                                                                                                                                                                                                                                             |
| Manuscript ID:                  | bmjopen-2013-003873                                                                                                                                                                                                                                                                                                                                                                                                                                                                                                                                                         |
| Article Type:                   | Research                                                                                                                                                                                                                                                                                                                                                                                                                                                                                                                                                                    |
| Date Submitted by the Author:   | 23-Aug-2013                                                                                                                                                                                                                                                                                                                                                                                                                                                                                                                                                                 |
| Complete List of Authors:       | Andersen, Hege; University Hospital of North Norway, CEO office; University of Tromsø, Department of sociology, political science and community planning. Faculty of humanities, social sciences and education<br>Røvik, Kjell Arne; University of Tromsø, Department of sociology, political science and community planning. Faculty of humanities, social sciences and education<br>Ingebrigtsen, Tor; University Hospital of North Norway, CEO office; University of New South Wales, Centre for clinical governance research. Australian institute of health innovation |
| <b>Primary Subject Heading</b>: | Health services research                                                                                                                                                                                                                                                                                                                                                                                                                                                                                                                                                    |
| Secondary Subject Heading:      | Health policy                                                                                                                                                                                                                                                                                                                                                                                                                                                                                                                                                               |
| Keywords:                       | Quality in health care < HEALTH SERVICES ADMINISTRATION & MANAGEMENT, Change management < HEALTH SERVICES ADMINISTRATION & MANAGEMENT, Organisational development < HEALTH SERVICES ADMINISTRATION & MANAGEMENT, Organisation of health services < HEALTH SERVICES ADMINISTRATION & MANAGEMENT                                                                                                                                                                                                                                                                              |
|                                 |                                                                                                                                                                                                                                                                                                                                                                                                                                                                                                                                                                             |

1  
2  
3 **Lean thinking in hospitals: Is there a cure for the absence of evidence?**  
4 **A systematic review of reviews**

5  
6 **Corresponding author:**  
7

8 Hege Andersen

9  
10 University Hospital of North Norway

11  
12 Box 100, 9038 Tromsø, Norway

13  
14 [Hege.andersen@unn.no](mailto:Hege.andersen@unn.no) Telephone no: +47 99530353 Fax: +47 77626041

15  
16 **Authors:**

17 Hege Andersen

18  
19 CEO office, University Hospital of North Norway, Tromsø Norway and

20  
21 Department of Sociology, Political Science, and Community Planning

22  
23 Faculty of Humanities, Social Sciences, and Education

24  
25 University of Tromsø, Norway.

26  
27 Kjell Arne Røvik

28  
29 Department of Sociology, Political Science, and Community Planning

30  
31 Faculty of Humanities, Social Sciences, and Education

32  
33 University of Tromsø, Norway.

34  
35 Tor Ingebrigtsen

36  
37 CEO office, University Hospital of North Norway, Tromsø Norway and

38  
39 Department of Clinical Medicine

40  
41 Faculty of Health Sciences

42  
43 University of Tromsø, Norway and

44  
45 Centre for Clinical Governance research

46  
47 Australian Institute of Health Innovation

48  
49 University of New South Wales, Sydney Australia

50  
51 **Key words:**

52 Lean thinking, quality improvement, health care, implementation, context

53  
54 **Word-count:** 3926

## ABSTRACT

**Objective:** Lean interventions aim to improve quality of health care by reducing waste, and facilitate flow in work processes. There is conflicting evidence on the outcomes of lean thinking, with quantitative and qualitative studies often contradicting each other. We suggest that reviewing the literature within the approach of a new contextual framework can deepen our understanding of lean as a quality improvement method. This article theorizes the concept of context by establishing a two-dimensional conceptual framework acknowledging lean as complex social interventions, deployed during several stages, and in different organizational dimensions. The specific aim of the study was to identify factors facilitating intended outcomes from lean interventions, and to understand when and in which dimension different facilitators contribute.

**Design:** A two-dimensional conceptual framework was developed by combining Shortell's *Dimensions of capability* with Walshes' *Domains of an intervention*. We then conducted a systematic review of lean review articles concerning hospitals, published in the period 2000-2012. The identified lean facilitators were categorized according to the intervention phases and dimensions of capability provided by the framework.

**Results:** We provide a framework emphasizing context by relating facilitators to stages and dimensions of capability. 23 factors enabling successful lean in hospitals were identified in the systematic review, whereby management and a supportive culture, training, accurate data, physicians and team involvement most frequent.

**Conclusions:** In the absence of evidence, the two-dimensional framework, incorporating the context, may prove useful for future research on variation in outcomes from lean interventions. Findings from the review suggest that characteristics and local application of lean, in addition to the organizations strategic and cultural capability, should be given further attention in health care quality improvement.

## ARTICLE SUMMARY

### Article focus

- There is conflicting evidence on the outcomes of lean thinking in health care.
- Reviewing the literature within the approach of a new contextual framework can deepen our understanding of lean as a quality improvement method.
- Identifying factors facilitating intended outcomes from lean interventions, contribute to new knowledge on when and how lean interventions works.

### Key messages

- 23 factors enabling successful lean in hospitals are identified, whereby management and a supportive culture, training, accurate data, physicians and team involvement most frequent.
- Characteristics of lean and local application, in addition to the organizations strategic and cultural capability, should be given further attention in health care quality improvement.
- In the absence of evidence, a framework incorporating the context may prove useful for future research on lean interventions.

### Strengths and limitations of this study

- This review of reviews sums up the mayor findings regarding facilitators for lean interventions in health care the latest decade.
- The immaturity of the research filed makes it hard to find solid evidence for effective lean interventions in health care.
- The fact that lean is social, complex and context-dependent interventions call for a shift from cause-effect to conditional attributions in research.

## INTRODUCTION

Lean thinking has been introduced in health care during the latest decades as a quality improvement method[1]. Lean can be challenging to adopt in a medical environment, where professionals require evidence before taking action[2-4]. Researchers remark a profound gap and tension between the medical approach and lean thinking[5 6]. The call for scientific proof for lean as an efficient and effective quality improvement method is strong[7]. Lack of evidence may lead to resistance and hinder speed up and spread of quality initiatives in health care[1 8-10].

Lean interventions aim to improve quality by reducing waste, and facilitate flow in patient care work processes[11]. Lean techniques include value stream mapping of start-to-end processes, identification and elimination of activities that do not add value, and streamlining of value-adding activities[12]. Focus on measurements and continuous improvement is expected to promote implementation and sustainability.

In a recent review, Mazzocato et al. (2010) concluded that lean has been applied successfully in health care institutions worldwide[13]. However, most studies have a narrow technical application with limited organizational reach. Many are single case studies, some quite anecdotal, while others are biased or characterized by a weak study design. Some reviews suggest that inappropriate analyses, a lack of alternative hypotheses, and other methodological limitations undermine validity[2 14]. This makes it difficult to rule out confounding explanatory factors, to measure outcomes and generalize results from lean interventions[6].

Advocates for experimental designs question results from qualitative studies, and argues that randomized controlled trials are necessary to isolate effects[15 16]. Most studies using an experimental design did not find any significant effect of lean interventions[2 5 9 10 14]. Experimental methods are not very helpful in understanding interventions' effectiveness because they rule out context, content, and application variables[9]. We cannot be sure that the specific intervention – and not other factors – produced the observed change[2 10].

Is there a cure for this lack of evidence? On a paramount level, one must ask whether absence of evidence justifies inaction[17]. The *quality chasm* between the health care we have and the

1  
2  
3 health care we should have is well documented[1 18 19]. In other words, the call for action is  
4 still there, and, these obstacles to quality improvement must be crossed.

### 6 **Lean as social, complex and context-dependent interventions**

8 Shortell et al. (2007) emphasized the need to link evidence-based medicine and what they  
9 refer to as evidence-based management, arguing that medicine must take into account the  
10 complex organizational and social context in which care is delivered[20]. Such integration of  
11 the intervention and its context seldom happens in quality improvement research[21].

12  
13 Lean interventions operate differently from the clinical interventions affecting biological  
14 systems, in which a linear cause-effect relationship controlling the influence of context is  
15 assumed. Context are simply defined as all surrounding factors that are not part of the  
16 intervention itself[8 22]. However, the boundaries between the intervention and its  
17 surroundings may be relatively arbitrary, as lean interventions are social, complex and  
18 inherently context-dependent[23 24]. Lean interventions consist of multiple, reciprocally  
19 interacting elements. They evolve over time in response to continuous feedback as situation  
20 dependent cumulative processes, and are therefore intrinsically unstable and difficult to  
21 standardize. Lean and other quality improvement methods are often adjusted, mixed,  
22 implemented and used simultaneously[5 10 25 26]. This fact challenges the strict distinction  
23 between lean and other quality improvement methods. Finally, lean interventions are open  
24 systems that feed back on themselves, so that with learning, they may change the conditions  
25 that made them work in the first place.  
26  
27  
28  
29  
30  
31  
32  
33  
34  
35  
36  
37

38 There is a growing literature on lean facilitators. We observe a growing consensus that  
39 characteristics like management, resources and culture matter, but the current knowledge base  
40 lacks specification on when and how the different facilitators work. This vagueness partly rest  
41 on insufficient methodological attention to the context in which lean interventions work. To  
42 understand and assess variation in lean interventions success there is a need for a conceptual  
43 framework defining facilitators for change at the stages and levels where they are activated.  
44 These facilitators, also named enablers, determinants for effectiveness and so on, may be  
45 defined as contextual factors which help the progress of lean interventions[8 21 27], and shift  
46 the focus from cause-effect to conditional attributions.  
47  
48  
49  
50  
51  
52  
53

54 The University Hospital of North Norway underwent a complex merger and restructuring  
55 process between 2007 and 2010[28]. An enterprise-wide comprehensive program for  
56  
57  
58  
59  
60

1  
2  
3 improvement of clinical pathways using lean methods was launched. The program aimed to  
4 accomplish a quality improvement effort in parallel with the organizational change to  
5 counteract the transitional setbacks in quality that large-scale change may entail[29]. A  
6 research program was established to evaluate the effects. We identified a need for a  
7 theoretical and methodological framework to analyse variation in adoption of lean  
8 interventions at the hospital. The proposed framework represents a theoretical tool to  
9 understand more of how and when lean interventions work. Our approach incorporates the  
10 complex social and organizational context in which the interventions are applied and the  
11 different stages of adoption. We suggest that the emerging knowledge could guide decision  
12 makers considering lean interventions, assessing the organizations readiness for change[21].  
13 The specific aim of the study was to identify factors influencing intended outcomes of lean  
14 interventions, and to understand when and in which dimension different factors contribute.  
15  
16  
17  
18  
19  
20  
21  
22  
23

## 24 **METHODS**

25  
26 A systematic narrative review[30] of reviews of quality improvement in hospitals was  
27 conducted. One reviewer performed the systematic review, supervised by the two co-authors.  
28 Discrepancies were resolved by discussion involving all three authors. The initial inclusion  
29 criteria were English language articles published in a peer-reviewed journal in the period  
30 2000-2012. Search words included hospital, health care, quality improvement, lean thinking,  
31 lean management, and review/evaluation. By searching Pubmed, Web of Science, Embase,  
32 Cochrane and Scopus, 251 articles were identified. A snowball approach was used to search  
33 for supplementary articles, adding 13 articles. 15 duplicate articles were removed. The titles  
34 and abstracts of these 249 articles were screened according to the *Prisma guidelines* for  
35 reporting reviews and meta analysis (supplementary file)[31]. 196 original articles were  
36 excluded. Exclusion criteria included absence of a hospital or organizational focus, single-unit  
37 case studies, and hybrid quality improvement approaches. As a result, 53 articles were  
38 assessed for eligibility. After a full-text review, another 35 articles were excluded by the  
39 criteria that neither large-scale quality improvement, success criteria or lean thinking were  
40 issued. Articles that mainly represented practical guidelines also were excluded. The final  
41 review included 18 articles[10 13 21 22 25 26 29 32-42].  
42  
43  
44  
45  
46  
47  
48  
49  
50  
51  
52  
53

## 54 **Data analysis**

1  
2  
3 The 18 articles were systematized according to the number of studies included in each review.  
4 Eight articles reviewed a number of definite cases, varying from four to 90 (median 33). The  
5 remaining articles were expert evaluations, narrative or unsystematic reviews, all covering  
6 lean interventions in hospitals. Half of the articles review only lean interventions, while the  
7 others include lean and corresponding methods like *Productive ward* and process oriented  
8 redesign. Lean was extracted and treated separately as far as possible, though confined by the  
9 observed mix, similarity and simultaneously use of different quality improvement methods in  
10 hospitals[5 21 25 26]. Methods used in the original studies were qualitative, quantitative, or a  
11 mixed-method approach. Most studies were based on cases originated in the United States,  
12 Australia and Great Britain.  
13  
14  
15  
16  
17  
18  
19  
20

21 The next step was to search for facilitators, defined as contextual factors predicted to promote  
22 quality improvement, as opposed to barriers that hinder improvement[35]. The decision to  
23 concentrate on facilitators and not barriers to lean improvement were based on the fact that  
24 the research literature at this field chiefly pays attention to facilitators and not barriers[5 8 10  
25 13 21 22 33 36]. In most cases, the facilitators were quite easy to identify in the texts despite  
26 different annotations used, including *enablers, conditions, factors* and *key facilitators, critical*  
27 *elements, determinants of effectiveness, and contextual characteristics*. Using the method of  
28 feature maps, which enable localization of similarities and differences among studies[30], the  
29 articles were systematically analyzed and recorded in a standardized format, according to the  
30 facilitators. The procedure were conducted by creating a worksheet categorizing every paper  
31 according to author, year of publishing, kind of review, supplementary quality improvement  
32 methods (in addition to lean), research method, labelling of facilitators, and facilitating  
33 factors. The complete worksheet is attached as a supplementary file.  
34  
35  
36  
37  
38  
39  
40  
41  
42  
43  
44

45 All the identified facilitators were assigned to larger categories. This classification was done  
46 to develop a more specific and practically focused state of knowledge concerning facilitators  
47 for lean thinking, as the need for an overview necessitated reducing the information to  
48 manageable amounts. All the identified facilitators concerning management and leadership  
49 were placed in the category *management*, covering subjects like management support,  
50 commitment and ownership. Cultural issues were all categorized as *supportive culture*,  
51 including views, norms and beliefs supporting lean. All facilitators concerning local  
52 translation were put in the category *adaption*, as all facilitators dealing with prior involvement  
53 in quality improvement work were grouped under the heading *experience*, and so on. After  
54  
55  
56  
57  
58  
59  
60



1  
2  
3 examining all the 149 facilitators, grouping them with similar ones, we ended up with a list  
4 comprising 23 facilitators. The different facets of these facilitators are all listed in box 1  
5 below. Finally, the frequency of each of the facilitators in the 18 reviews was accounted for.  
6  
7  
8

### 9 10 **A theoretical and methodological framework**

11 Lean interventions consist of several different phases, from planning and preparation to  
12 implementation and sustainability, involving different organizational capabilities. The  
13 facilitators for improvement were analyzed and reorganized in a table combining Shortell's  
14 *dimensions of capability*[243], and Walshe's *domains of an intervention*[9]. Shortell  
15 categorized improvement factors according to cultural, technical, strategic, and structural  
16 dimensions of an intervention. The *cultural* dimension refers to the underlying beliefs, values,  
17 norms and behaviours of the organization. The *technical* dimension covers training and  
18 information system issues, while the *strategic* dimension emphasizes the conditions that offer  
19 the greatest opportunities to change. This dimension touch upon the degree of integration of  
20 quality improvement in the hospital's strategic plans, and to which extent improvement efforts  
21 are devoted to processes central to strategic priorities. The *structural* dimension relate to  
22 mechanisms that facilitate learning and disseminate best practices throughout the  
23 organization. The four dimensions are multiplicative, interrelated, and equally necessary for  
24 lasting quality improvement according to Shortell. Varying lean success can be understood as  
25 a result of the interplay of dynamic processes related to the four dimensions[43].  
26  
27  
28  
29  
30  
31  
32  
33  
34  
35  
36  
37

38 Walshe's differentiated domains or phases in quality interventions are labelled as context,  
39 content, application and outcomes. The context involves the preparation phase before starting  
40 improvement work, highlighting aspects of the situation, setting or organization in which the  
41 intervention is deployed. This is a narrow view of context, and should not be confused with  
42 the broader understanding of context as all surrounding factors that are not part of the  
43 technical intervention itself[8]. In this article, we therefore renamed this phase as the  
44 organizational *setting*. The *content* describes the phase where lean is introduced as a tool, the  
45 nature or characteristics of the intervention itself. The content of lean may be standardized  
46 and repeatable or modified and easy to redesign. The *application* covers the process through  
47 which the intervention is delivered. This process may be protocol-driven or widely varying  
48 depending on local actors. *Outcomes* are the results of the intervention, including the  
49 maintenance phase after implementation. All of these phases may be characterized by low or  
50 high variance. High levels of variance in the settings, content and application may explain  
51  
52  
53  
54  
55  
56  
57  
58  
59  
60

1  
2  
3 interventions varying success. Variances also reduce the ability to generalize empirically, and  
4 to draw conclusions about effects from one specific context to another. The complex  
5 relationship between context, content, application and outcomes must be unpicked to develop  
6 a situational understanding of effectiveness[9].  
7  
8  
9

10  
11 By combining Shortell's dimensions and Walshe's domains, this two-dimensional framework  
12 made it possible to classify identified facilitators for quality improvement, both as emerging  
13 in different phases in a multistage process and by different organizational dimensions. The  
14 framework was used to describe and understand the organizational and contextual factors  
15 encountered in an organizational-wide quality improvement effort.  
16  
17  
18  
19

## 20 21 **RESULTS**

22  
23 Among the 18 reviewed articles, 149 facilitators for lean interventions were found. The  
24 reviews identified three to 16 (median seven) facilitators for improvement. All were identified  
25 in several reviews, varying from three to 14 (median seven) times. The facilitators were  
26 categorized into 23 extensive classes, covering the range of all the identified facilitators.  
27  
28  
29  
30  
31  
32  
33  
34  
35  
36  
37  
38  
39  
40  
41  
42  
43  
44  
45  
46  
47  
48  
49  
50  
51  
52  
53  
54  
55  
56  
57  
58  
59  
60

Box 1: Facilitators for change: description

**Adaption:** Local translation of the Lean intervention

**Measurement:** Audits local performance metrics on regular basis as evidence

**Holistic approach:** Lean as an entire value system, embracing every day improvement

**Belief:** In staff and patient benefits encourage willingness and motivation

**Experience:** Prior quality improvement using a successful, mature method

**Administrative support:** Practical facilitation by a project management

**Competence:** In tools, assumptions and methods assure capability

**Communication:** With and between patients and staff, including feedback to both

**Alignment:** Consistency to strategic objectives and priorities of strategic importance

**IT-systems:** Adequate IT support and infrastructure established

**Continuous improvement:** A long-term plan, securing endured and sustained attention

**System-wide scope:** Multifaceted interventions, across silos and functional divides

**Vision:** Targets of urgency and direction, but realistic, simple and practical solutions

**Customer focus:** Include patient and workforce value creation and improvements

**External support:** Expert change agents, networks and sponsorship triggers change

**Staff involvement:** Commitment, engagement, and empowerment by staff participation

**Resources:** Available, sufficient and accessible capacities

**Accurate data:** Robust and timely, evidence-based data as a impetus to change

**Physicians:** Clinical leadership and champions' engagement, support and collaboration

**Teamwork:** Multi-skilled and –disciplinary team collaboration including decision-making

**Training:** Accessible, substantial, practical and relevant training for immediate use

**Supportive culture:** Views, norms and beliefs that support lean represent readiness

**Management:** Leadership support, ownership and commitment

Figure 1 show how frequent the different facilitators were identified in the 18 reviews.

Figure 1: Frequency of different facilitators identified in 18 reviewed articles

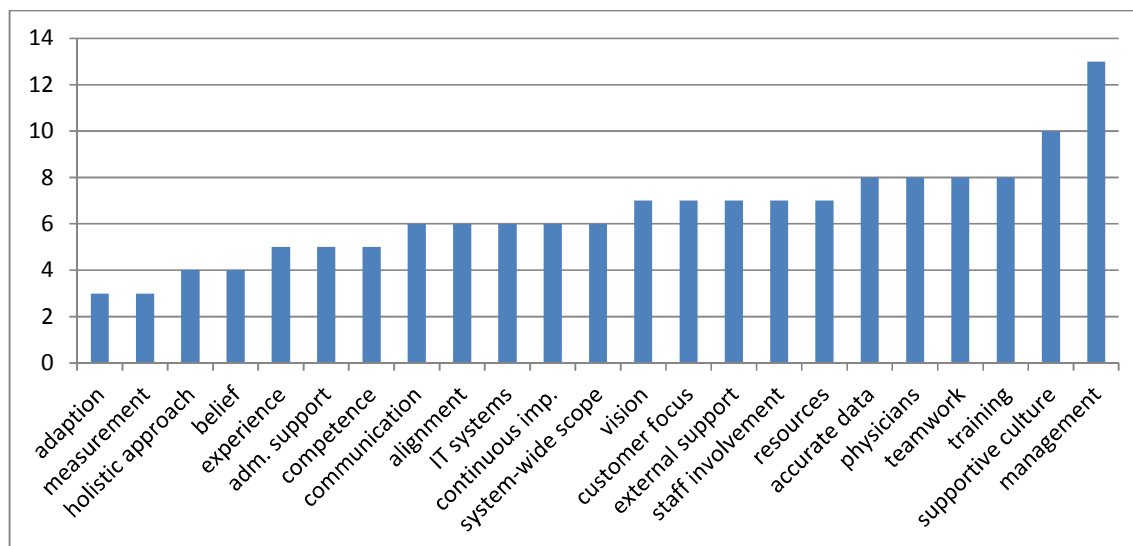

Table 1 show how the different facilitators were found relevant in the different intervention phases and affected organizational dimension.

Table 1: Facilitators for change, literature reviews 2000–2012

| Dimensions of capability                                                              | Part of the intervention              |                                                |                                       |                                             |
|---------------------------------------------------------------------------------------|---------------------------------------|------------------------------------------------|---------------------------------------|---------------------------------------------|
|                                                                                       | Setting<br>Situation and organization | Content<br>Characteristics of the intervention | Application<br>Local delivery process | Outcomes<br>Results and maintenance         |
| <i>Cultural</i><br>Underlying beliefs, values, norms and behavior                     | Experience<br>Belief                  | Adaption<br>Customer focus                     | Teamwork                              | Supportive culture                          |
| <i>Technical</i><br>Training and info support systems                                 | IT systems<br>Competence              | Training                                       | Administrative support                | Communication                               |
| <i>Strategic</i><br>Strategic importance and opportunity to change                    | Alignment<br>Vision                   | Resources                                      | Physicians<br>Management              | Holistic approach<br>Continuous improvement |
| <i>Structural</i><br>Mechanisms to facilitate learning and disseminate best practices | External support                      | Accurate data                                  | Staff involvement                     | Measurement<br>System-wide scope            |

**Setting: Situation and organization.**

1  
2  
3 Initially, a well-proven, successful quality improvement method characterized by program  
4 maturity facilitates. Prior experience are enabling improvement[22 29 35]. Lean should be  
5 accompanied by success stories demonstrating benefits for patients and staff. This relates to  
6 the organization's cultural capability and the influence of the underlying beliefs, values,  
7 norms, and behaviours. Motivation influences the willingness to participate[13 33 35 36 38 39  
8 42]. IT-systems infrastructure and competence[22 29 33-36], as well as external experts  
9 sponsoring, strengthen the technical and structural capability. Sponsorship triggers learning  
10 and may contribute to dissemination of best practices throughout the organization[29 32 33  
11 36-38 42]. Competence in tools and methods support the assumptions of lean, and increase  
12 the potential for change[25 26 34 36]. Ambitious targets aligned with the hospital's overall  
13 goals and strategies strengthen the strategic capability[29 33 34 36 39 42]. The goals have to  
14 be of strategic importance, but at the same time realistic, based on simple and practical  
15 solutions[21 29 33 34 38 42].  
16  
17  
18  
19  
20  
21  
22  
23  
24  
25

### 26 **Content: Characteristics of the intervention**

27  
28 Adaption and translation to local conditions are a precondition for success[25 32 35]. A  
29 methodology communicating a clear patient and workforce focus supports the cultural  
30 dimension. Emphasis on patient processes, value creation, and patient needs facilitate quality  
31 improvement in health care[10 13 22 32 35 40 42]. Access to, and accomplished substantial  
32 training in methods and tools strengthens the organizations technical capability[10 21 25 29  
33 32-34 36 42], as sufficient and available resources affect the strategic dimension[10 21 22 29  
34 32-34 36 42]. On the structural dimension, accurate and robust data represent an impetus to  
35 learning and spread of best practices. Timely data contribute to an evidence-based quality  
36 improvement initiative, which facilitates lean interventions[13 33-35 37 38 42]. Availability  
37 and sufficiency of training, data and other resources are among the most frequent facilitators  
38 in the reviewed articles, and thereby among the most important drivers for change.  
39  
40  
41  
42  
43  
44  
45  
46  
47

### 48 **Application: Local delivery process**

49 Collaborating multidisciplinary and multi-skilled teams strongly facilitate local application of  
50 lean[22 29 32 34-36 40 41]. Strengthening the improvement culture presupposes workforce  
51 stability, team leadership, and decentralized decision making. Administrative project  
52 management and practical support secures backing, and contributes to the technical capability  
53 of the organization[21 29 34 42]. Strategically, involvement of physicians and management  
54 encourage change. Management engagement include both frontline and senior managers[10  
55  
56  
57  
58  
59  
60

1  
2  
3 13 21 22 29 32-34 36-40 42]. Physicians represent champions and clinical leadership, and  
4 their involvement, engagement, and collaboration are crucial at the strategic level[10 22 29 33  
5 34 36 38 41]. Both management and physicians involvement are among the most frequent  
6 identified enablers of quality improvement in the literature. Key factors to disseminate best  
7 practices are staff participation, engagement, and empowerment. Staff commitment,  
8 responsibility and ownership, are required for achieving lasting outcomes of lean  
9 interventions[25 32 36-40 42].  
10  
11  
12  
13

### 14 15 16 **Outcomes: Results and maintenance**

17 To secure maintenance, a hospital depends strongly on a supportive culture characterized by  
18 norms and beliefs supporting quality improvement and readiness[10 21 22 32 34-36]. At the  
19 technical dimension, communication and feedback between patients and staff are  
20 facilitating[29 32 36 41 42]. Strategically, a holistic approach based on continuous  
21 improvement and sustained attention affect the ability to accomplish change. A holistic  
22 approach emphasizes that lean is a tool not only to promote everyday improvement but also a  
23 philosophy of ongoing quality improvement within the hospital's value system[13 26 32 33  
24 39]. A long-term plan should be established to secure continuous improvement[10 13 25 26  
25 33 35]. Local audits and measurements conducted on a regular basis relate to the  
26 organization's structural capability, which strengthen the evidence for lean interventions[34  
27 35 37 38]. A system-wide multifaceted approach, across functional divides, allows best  
28 practices to be learned and disseminated.  
29  
30  
31  
32  
33  
34  
35  
36  
37  
38

39 In addition to a supportive culture, the most frequent facilitators are identified in the *content*  
40 and local *application* parts of the intervention. That is, the most reported success-factors for  
41 lean, touch upon characteristics of the intervention and its local delivery process. Most of the  
42 frequent facilitators concern the *strategic* or the *cultural* dimension of capability,  
43 interventions strategic importance to the hospitals overall goals and the organizations  
44 underlying beliefs, values, norms and behavior.  
45  
46  
47  
48  
49  
50

## 51 **DISCUSSION**

52 Analysis based on the conceptual framework suggest that understanding which facilitators  
53 influence the intervention at different stages and dimensions of capability, probably is more  
54 important than a quantitative approach[8 33]. The emphasis on the interventions different  
55  
56  
57  
58  
59  
60

1  
2  
3 parts and the organizational dimensions represent a shift from cause-effect to conditional  
4 attributions[43]. Each part and dimension is influenced by the status of other dimensions. Our  
5 results summarized in table 1 show that a number of facilitators representing the four  
6 dimensions may interact during the four stages of change. The four dimensions and the  
7 associated facilitators are interrelated and equally necessary to achieve lasting results[2]. In  
8 the following, we elaborate our interpretation of these findings.  
9  
10  
11  
12

13  
14 Rycroft-Malone et al (2002) concludes that there are three key elements of implementation:  
15 evidence, facilitation and context[44]. Our analyses of data from previous review articles  
16 within this new framework show that successful lean interventions share some common  
17 features. We identified 23 facilitators associated with successful interventions. However, it is  
18 evident that little is known about which facilitators that are most important[8 21].  
19 Management and leadership engagement was identified as important by 13 of the 18 reviewed  
20 reviews. The other facilitators most frequently identified were a supportive culture, accurate  
21 data and training, along with physician and team involvement. This is in accordance with the  
22 conclusions from recent research in the field, and may indicate that these facilitators are vital  
23 to accomplish quality improvement[13 22 29 32]. Two recent reviews conclude that  
24 leadership, culture, maturity, and data infrastructure have a stronger evidence base than  
25 others[22 36]. Our results nevertheless suggest that successful interventions must utilise  
26 multiple facilitators from the four dimensions of capability, interplaying as the change  
27 processes go through its four stages. The observation that the facilitators identified in this  
28 study were in accordance with those promoted in other, broader theories of implementation  
29 concerning uptake of evidence and innovations in health care[22 44 45] strengthen the  
30 findings.  
31  
32  
33  
34  
35  
36  
37  
38  
39  
40  
41  
42  
43

44 The most frequent facilitators belong to the *content* or *application* part of the intervention.  
45 This may indicate that policymakers should pay special attention to the content of lean and the  
46 local delivery process. Sufficient resources, accurate data and training are crucial for lean  
47 interventions to succeed. Lean are not a receipt that can be implemented locally if the training  
48 or available resources are inadequate. The need for local resource allocation should not be  
49 underestimated. This is in accordance to Radnor et al (2012), that advocate that lean  
50 interventions must be contextualized, rather than transplanted like a recipe[26].  
51  
52  
53  
54  
55  
56  
57  
58  
59  
60

1  
2  
3 This assertion is supported by the frequently identified facilitators labelled physicians and  
4 management. Leadership and clinical leadership are keys to understand why, or why not, lean  
5 interventions make contributions to health care[46]. Finally, the local application of lean in  
6 hospitals depends heavily on teamwork by multi-skilled and multidisciplinary teams. Work-  
7 floor staff must be engaged and empowered. Womack and Jones (2003) that initially  
8 advocated lean thinking in healthcare, emphasized the multi-skilled teams as a main  
9 advantage for hospitals, making lean suitable for health care[12].  
10  
11  
12  
13  
14

15  
16 The cultural and strategic dimensions of capability embrace most of the frequent facilitators.  
17 A supportive culture are fundamental to achieve quality improvements[36]. The  
18 organizational culture and the strategic importance of the patient path exposed to the  
19 improvement initiative are essential to understand variation in outcomes of lean interventions.  
20 Available resources, physicians and managements involvement, indicate and affect the  
21 strategic importance and thereby the opportunity to change. This finding are supported by  
22 other recent hospital-based studies, like Rozenblum et al (2013)[46].  
23  
24  
25  
26  
27  
28

29  
30 The main contribution of this review is a two-dimensional framework for identification and  
31 analysis of facilitators for lean interventions in health care. This framework incorporates the  
32 complex social and organizational context in which lean are applied. These findings coincide  
33 with recent research calling for more attention to the influence of organizational context when  
34 trying to understand variance in interventions in healthcare[22]. We suggest that it will prove  
35 useful in future research aiming for a better understanding of how the likelihood to  
36 accomplish success in lean interventions can be increased[14]. The framework will also be  
37 used in future research locally at the hospital, as a practical tool to assess variation in adoption  
38 of lean.  
39  
40  
41  
42  
43  
44  
45

### 46 **Limitations**

47 Making these interpretations from a systematic review of reviews must take the methods  
48 limitations into consideration. The facilitators were grouped with similar ones, and sometimes  
49 renamed, risking that the original meaning could be misread and mistranslated. Conducting  
50 feature maps and presenting all the identified facilitators in appendices promote transparency.  
51 Further on, it could be argued that facilitators identified in large reviews should be given more  
52 weight than those identified in smaller ones. However, our analysis identified the same  
53 facilitators across small and large reviews. Therefore, weighting was not conducted.  
54  
55  
56  
57  
58  
59  
60



1  
2  
3 And finally, including both qualitative and quantitative studies eliminates the possibility of  
4 quantifying the findings and predicting effects of the various facilitators by meta-analysis.  
5  
6 The inclusion of both types of studies broadens the scope, increase the ability to identify an  
7  
8 ampler spectre of facilitators, and contribute to understanding the role of context in lean  
9  
10 interventions.

### 11 12 13 **Directions for future research**

14 A critical review concluded that most of the research on hospital quality is dominated by  
15 questions of *what* and does not go further to investigate the *how*, *when*, and *why*[47]. They  
16 called for approaches that incorporate structure, process, and outcomes. The fact that we  
17 know so little about the relationship between these, makes it difficult to recommend ways of  
18 organizing that could improve patient care[48].  
19  
20  
21  
22  
23

24 The facilitators identified and the two-dimensional framework proposed in the present work  
25 incorporates structure and process. Still, the facilitators are characterized by vagueness, as  
26 broad and comprehensive determinants, that needs further specification and practical content  
27 to guide future effective quality improvements to health care organizations[21]. A logical next  
28 step will be to measure and analyse outcomes in the context of this framework, with the  
29 identified facilitators as explanatory variables. Possible measures of outcomes could be  
30 related to the health care providers performance (adherence to recommended practice), patient  
31 outcome (as quality of life or mortality), surrogate outcomes (as readmission) and  
32 organizational outcomes (like resource use or sustainability)[34]. At the University Hospital  
33 of North Norway, more than five years of lean experience and more than 20 implemented lean  
34 interventions leave us with a sufficient amount of empirically based cases to assess due to  
35 varying success.  
36  
37  
38  
39  
40  
41  
42  
43  
44  
45

### 46 **CONCLUSION**

47 We provide a framework, which emphasizes the importance of context by relating facilitators  
48 to four dimensions of organizational capability and four stages of change, and suggest that  
49 this represent a practical tool for understanding and assessing variation in lean adoption. The  
50 article can contribute to reduce the gap between theory and practice, by a shift in focus from  
51 cause-effect to conditional attributes or characteristics of an effective organization-wide  
52 quality intervention. The review of reviews identified 23 interrelated facilitators for lean in  
53  
54  
55  
56  
57  
58  
59  
60

1  
2  
3 hospitals, where management engagement, cultural support, accurate data and training, along  
4 with teamwork, physician and staff involvement were most frequent. The findings suggest  
5 that characteristics of lean and the local application should be given attention, in addition to  
6 the organizations cultural and strategic capability.  
7  
8  
9

10  
11 Acknowledgements: The authors would like to thank David Greenfield (PhD) and John  
12 Øvretveit (PhD) for their assistance in clarifying concepts in the discussion. We would also  
13 like to thank James Morrison for his language assistance.  
14  
15

16 Contributors: All the listed authors met the authorship requirements as defined by the ICJME.  
17 HA contributed to the conception and design, the acquisition, analysis and interpretation of  
18 the data, as well as drafting and revising the article. TI and KAR made a substantial  
19 contribution to the design and interpretation of the data, as well as to drafting and critical  
20 revising of the article. All the authors have provided final approval of the submitted  
21 manuscript.  
22  
23

24 Funding: The PhD-study is founded by the regional health trust of North Norway, Helse Nord  
25 RHF  
26  
27

28 Competing interest: None  
29  
30  
31  
32  
33  
34  
35  
36  
37  
38  
39  
40  
41  
42  
43  
44  
45  
46  
47  
48  
49  
50  
51  
52  
53  
54  
55  
56  
57  
58  
59  
60

1. Joosten T, Bongers I, Janssen R. Application of lean thinking to health care: issues and observations. *International Journal for Quality in Health Care* 2009;**21**(5):341-47
2. Shortell SM. *Assessing the Implementation and Impact of Clinical Quality Improvement Efforts: Abstract, Executive Summary and Final Report*. Agency for Health Care Policy and Research, 1998.
3. Shojania KG, Grimshaw JM. Evidence-based quality improvement: the state of the science. *Health Affairs* 2005;**24**(1):138-50
4. Rycroft-Malone J, Kitson A, Harvey G, et al. Ingredients for change: revisiting a conceptual framework. *Quality and Safety in Health Care* 2002;**11**(2):174-80 doi: 10.1136/qhc.11.2.174[published Online First: Epub Date].
5. Young T, McClean S. A critical look at Lean Thinking in healthcare. *Quality and Safety in Health Care* 2008;**17**(5):382-86
6. Alexander JA, Hearld LR. What Can We Learn From Quality Improvement Research? A Critical Review of Research Methods. *Medical Care Research and Review* 2009 doi: 10.1177/1077558708330424[published Online First: Epub Date].
7. de Souza LB. Trends and approaches in lean healthcare. *Leadership in Health Services* 2009;**22**(2):121-39
8. Øvretveit J. Understanding the conditions for improvement: research to discover which context influences affect improvement success. *BMJ quality & safety* 2011;**20**(Suppl 1):i18-i23
9. Walshe K. Understanding what works—and why—in quality improvement: the need for theory-driven evaluation. *International Journal for Quality in Health Care* 2007;**19**(2):57-59
10. Øvretveit J, Gustafson D. Evaluation of quality improvement programmes. *Quality and Safety in Health Care* 2002;**11**(3):270-75
11. Liker JK, Kaisha TJKK. *The Toyota way: 14 management principles from the world's greatest manufacturer*. McGraw-Hill New York, 2004.
12. Womack JP, Jones DT. *Lean thinking: banish waste and create wealth in your corporation, revised and updated*. Free Press, 2003.
13. Mazzocato P, Savage C, Brommels M, et al. Lean thinking in healthcare: a realist review of the literature. *Quality and Safety in Health Care* 2010;**19**(5):376-82
14. Vest JR, Gamm LD. A critical review of the research literature on Six Sigma, Lean and studergroup's hardwiring excellence in the United States: the need to demonstrate and communicate the effectiveness of transformation strategies in healthcare. *Implement Sci* 2009;**4**(35):1-9
15. Craig P, Dieppe P, Macintyre S, et al. Developing and evaluating complex interventions: the new Medical Research Council guidance. *BMJ* 2008;**337**(sep29\_1):a1655-a55
16. Perneger T. Ten reasons to conduct a randomized study in quality improvement. *International Journal for Quality in Health Care* 2006;**18**(6):395-96
17. Altman DG, Bland JM. Statistics notes: Absence of evidence is not evidence of absence. *BMJ* 1995;**311**(7003):485 doi: 10.1136/bmj.311.7003.485[published Online First: Epub Date].
18. Corrigan JM. *Crossing the quality chasm*. Washington, DC, National Academy Press, 2001.
19. Kohn LT, Corrigan J, Donaldson MS. *To err is human: building a safer health system*. Joseph Henry Press, 2000.
20. Shortell SM, Rundall TG, Hsu J. Improving patient care by linking evidence-based medicine and evidence-based management. *JAMA: the journal of the American Medical Association* 2007;**298**(6):673-76
21. Walshe K, Freeman T. Effectiveness of quality improvement: learning from evaluations. *Quality and Safety in Health Care* 2002;**11**(1):85-87
22. KAPLAN HC, BRADY PW, DRITZ MC, et al. The influence of context on quality improvement success in health care: a systematic review of the literature. *Milbank Quarterly* 2010;**88**(4):500-59
23. Davidoff F. Systems of service: reflections on the moral foundations of improvement. *BMJ quality & safety* 2011;**20**(Suppl 1):i5-i10
24. Pawson R, Greenhalgh T, Harvey G, et al. Realist review—a new method of systematic review designed for complex policy interventions. *Journal of health services research & policy* 2005;**10**(suppl 1):21-34
25. Walshe K. Pseudoinnovation: the development and spread of healthcare quality improvement methodologies. *International Journal for Quality in Health Care* 2009;**21**(3):153-59
26. Radnor ZJ, Holweg M, Waring J. Lean in healthcare: The unfilled promise? *Social Science & Medicine* 2012;**74**(3):364-71
27. Shortell SM, Bennett CL, Byck GR. Assessing the impact of continuous quality improvement on clinical practice: what it will take to accelerate progress. *Milbank Quarterly* 2001;**76**(4):593-624
28. Ingebrigtsen T, Lind M, Krogh T, et al. Merging of three hospitals into one university hospital. *Tidsskrift for den Norske lægeforening: tidsskrift for praktisk medicin, ny række* 2012;**132**(7):813

- 1
  - 2
  - 3
  - 4
  - 5
  - 6
  - 7
  - 8
  - 9
  - 10
  - 11
  - 12
  - 13
  - 14
  - 15
  - 16
  - 17
  - 18
  - 19
  - 20
  - 21
  - 22
  - 23
  - 24
  - 25
  - 26
  - 27
  - 28
  - 29
  - 30
  - 31
  - 32
  - 33
  - 34
  - 35
  - 36
  - 37
  - 38
  - 39
  - 40
  - 41
  - 42
  - 43
  - 44
  - 45
  - 46
  - 47
  - 48
  - 49
  - 50
  - 51
  - 52
  - 53
  - 54
  - 55
  - 56
  - 57
  - 58
  - 59
  - 60
29. Vos L, Chalmers SE, Dücker MLA, et al. Towards an organisation-wide process-oriented organisation of care: A literature review. *Implementation Science* 2011;**6**(1):8
30. Hart C. *Doing a literature review*. London: Sage Publications, 1998.
31. Moher D, Liberati A, Tetzlaff J, et al. Preferred reporting items for systematic reviews and meta-analyses: the PRISMA statement. *PLoS medicine* 2009;**6**(7):e1000097
32. Poksinska B. The current state of Lean implementation in health care: literature review. *Quality Management in Healthcare* 2010;**19**(4):319
33. Powell A, Rushmer R, Davies H. A systematic narrative review of quality improvement models in health care. *Social Dimensions of Health Institute at The Universities of Dundee and St Andrews* 2008
34. Brennan S, McKenzie J, Whitty P, et al. Continuous quality improvement: effects on professional practice and healthcare outcomes. *The Cochrane Library* 2009
35. de Souza LB, Pidd M. Exploring the barriers to lean health care implementation. *Public Money & Management* 2011;**31**(1):59-66
36. Kaplan HC, Provost LP, Froehle CM, et al. The Model for Understanding Success in Quality (MUSIQ): building a theory of context in healthcare quality improvement. *BMJ quality & safety* 2012;**21**(1):13-20
37. Kim CS, MBA DAS, Billi JE. Creating value in health care: the case for lean thinking. *JCOM* 2009;**16**(12)
38. Kim CS, Spahlinger DA, Kin JM, et al. Implementation of Lean Thinking: one health system's journey. *Joint Commission Journal on Quality and Patient Safety* 2009;**35**(8):406-13
39. Lukas CVD, Holmes SK, Cohen AB, et al. Transformational change in health care systems: an organizational model. *Health care management review* 2007;**32**(4):309-20
40. Kollberg B, Dahlgaard JJ, Brehmer PO. Measuring lean initiatives in health care services: Issues and findings. *International Journal of Productivity and Performance Management* 2007;**56**(1):7-24
41. Winch S, Henderson AJ. Making cars and making health care: a critical review. *Medical Journal of Australia* 2009;**191**(7):415
42. Morrow E, Robert G, Maben J, et al. Emerald Article: Implementing large-scale quality improvement: Lessons þyfromTheProductiveWard: ReleasingTimetoCare! *Quality Assurance* 2012;**25**(4):237-53
43. O'Brien JL, Shortell SM, Hughes EF, et al. An integrative model for organization-wide quality improvement: lessons from the field. *Quality Management in Healthcare* 1995;**3**(4):19-30
44. Rycroft-Malone J, Kitson A, Harvey G, et al. Ingredients for change: revisiting a conceptual framework. *Quality & Safety in Health Care* 2002;**11**:174 - 80
45. Greenhalgh T, Robert G, Macfarlane F, et al. Diffusion of innovations in service organizations: systematic review and recommendations. *Milbank Quarterly* 2004;**82**(4):581-629
46. Rozenblum R, Lisby M, Hockey PM, et al. The patient satisfaction chasm: the gap between hospital management and frontline clinicians. *BMJ quality & safety* 2013;**22**(3):242-50
47. Hearld LR, Alexander JA, Fraser I, et al. Review: how do hospital organizational structure and processes affect quality of care? A critical review of research methods. *Medical Care Research and Review* 2008;**65**(3):259-99
48. West E. Management matters: the link between hospital organisation and quality of patient care. *Quality in Health Care* 2001;**10**(1):40-48

Appendix 1. Flow chart, detailed search strategy (Web only)

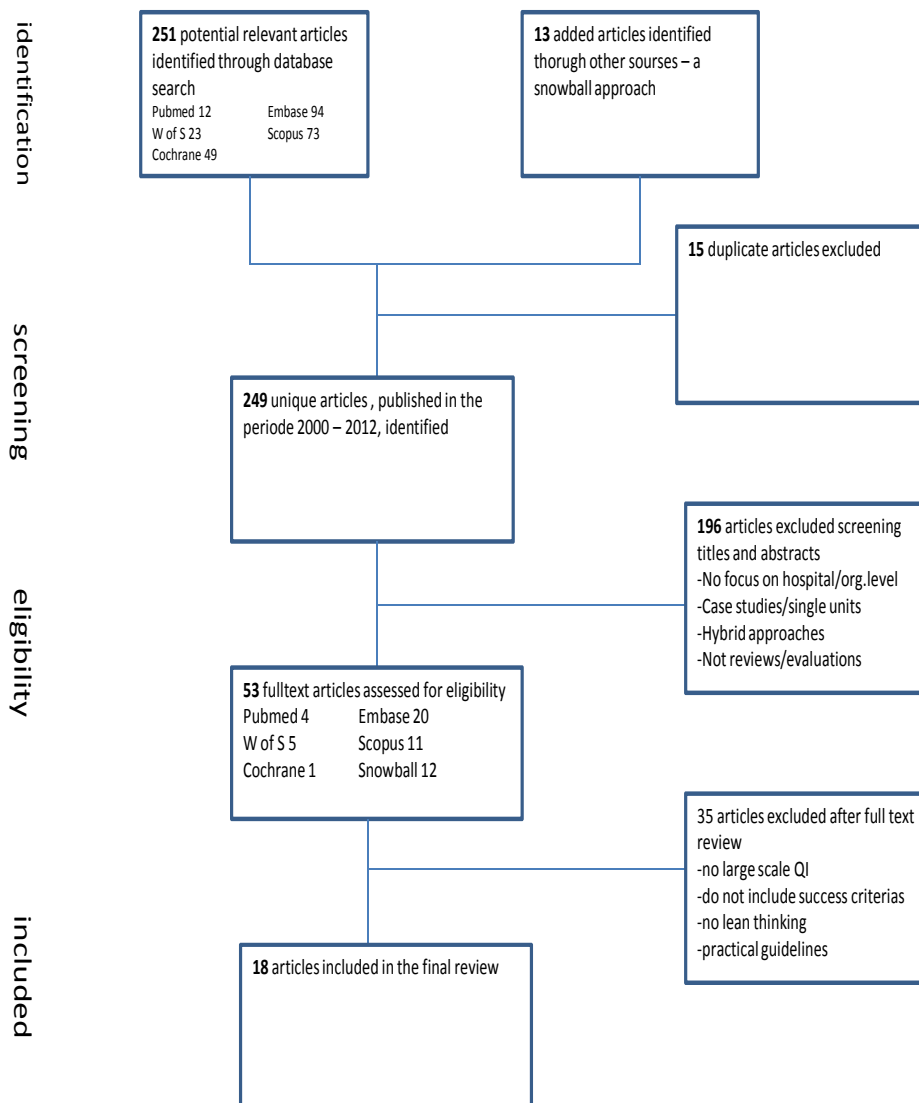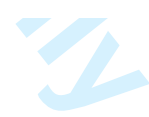

1  
2  
3  
4  
5  
6  
7  
8  
9  
10  
11  
12  
13  
14  
15  
16  
17  
18  
19  
20  
21  
22  
23  
24  
25  
26  
27  
28  
29  
30  
31  
32  
33  
34  
35  
36  
37  
38  
39  
40  
41  
42  
43  
44  
45  
46  
47  
48  
49  
50  
51  
52  
53  
54  
55  
56  
57  
58  
59  
60

1  
2  
3  
4  
5  
6  
7  
8  
9  
10  
11  
12  
13  
14  
15  
16  
17  
18  
19  
20  
21  
22  
23  
24  
25  
26  
27  
28  
29  
30  
31  
32  
33  
34  
35  
36  
37  
38  
39  
40  
41  
42  
43  
44  
45  
46  
47  
48  
49

Appendix 2. Articles comprised by the review (web only)

| Author/<br>year                             | Review/<br>size       | QI/<br>research method                                                              | Labels                                                                | Factors                                                                                                                                                                                                                                                                                                                                                                                                                                                                                                                                                                                                                                                                                       |
|---------------------------------------------|-----------------------|-------------------------------------------------------------------------------------|-----------------------------------------------------------------------|-----------------------------------------------------------------------------------------------------------------------------------------------------------------------------------------------------------------------------------------------------------------------------------------------------------------------------------------------------------------------------------------------------------------------------------------------------------------------------------------------------------------------------------------------------------------------------------------------------------------------------------------------------------------------------------------------|
| Poksinska B. 2010                           | Review<br>30 articles | Lean.<br>Theoretical/ case studies.                                                 | Enablers                                                              | <ul style="list-style-type: none"> <li>Commitment/participation from staff that owns and drives it</li> <li>Training and responsibility to staff (empowerment)</li> <li>Consultants/trainers from health care</li> <li>Management support, ownership and resources</li> <li>Organization culture</li> <li>An holistic approach - lean is not a toolbox</li> <li>Improve the entire system, involve several units</li> <li>Adaption, not adoption</li> <li>Clear view of the customer</li> <li>Teamwork, collaboration and communication</li> </ul>                                                                                                                                            |
| Powell A, Rushmer R, Davies H. 2008.        | Review<br>59 articles | QI, including Lean.<br>Observation, interviews, action research.                    | Necessary but not sufficient conditions for successful implementation | <ul style="list-style-type: none"> <li>Alignment with strategic objectives</li> <li>Quality as part of everyday life/every ones work</li> <li>Long time approach</li> <li>Active health professionals/doctors engagement</li> <li>Belief that staff/patient will benefit</li> <li>Strong leadership and clear vision</li> <li>Sustained active participation from board and senior management</li> <li>Multifaceted interventions sustained action at different levels</li> <li>Substantial investment in training and development (including IT and training of staff)</li> <li>Support from "change agents" to provide skills</li> <li>Robust and timely data</li> <li>Resources</li> </ul> |
| Vos L, Chalmers SE, Dückers MLA et al. 2011 | Review<br>10 articles | Process oriented redesign including Lean.<br>Uncontrolled before-after evaluations. | Factors for success                                                   | <ul style="list-style-type: none"> <li>Senior management support</li> <li>Clinical leadership and involvement</li> <li>Team-based problem solving</li> <li>Adequate information and communication technology support</li> <li>Administrative support</li> <li>Ambitious targets</li> <li>External facilitators</li> <li>Organizational readiness</li> <li>Selection and execution of projects in order of urgency</li> <li>Using a change strategy that already proved to be successful</li> <li>Good communication and training in QI techniques</li> </ul>                                                                                                                                  |

|                                                |                                              |                                                          |                                                                          |                                                                                                                                                                                                                                                                                                                                                                                                                                                                                                                                                                                                                                                                                  |
|------------------------------------------------|----------------------------------------------|----------------------------------------------------------|--------------------------------------------------------------------------|----------------------------------------------------------------------------------------------------------------------------------------------------------------------------------------------------------------------------------------------------------------------------------------------------------------------------------------------------------------------------------------------------------------------------------------------------------------------------------------------------------------------------------------------------------------------------------------------------------------------------------------------------------------------------------|
| Brennan S, McKenzie J, Whitty P, et al 2009    | Review - protocol                            | QI, including Lean. Qualitative and quantitative.        | Dimensions of capability thought necessary for successful implementation | Views, norms, beliefs, and behaviors that support the principles and practice of QI<br>Competency in QI methods and tools<br>Alignment of QI activities with the organizations priorities<br>Management structures and systems that support QI, including appropriate data and analysis systems.<br>Leadership support for QI at all levels.<br>Ability to work as a team (team performance), team member participation,<br>Presence of a champion<br>Physician support and participation,<br>team members technical competence,<br>training in theory, methods, and tools,<br>support to facilitate implementation and use,<br>the nature and complexity of the targeted change |
| de Souza LB, Pidd M. 2011                      | Review 90 articles                           | Lean. Case studies.                                      | Success factors                                                          | Clarify the nature of lean healthcare,<br>provide evidence that it works,<br>focus on patient processes,<br>translate it,<br>make a culture,<br>data – evidence based,<br>continuous improvement,<br>multidisciplinary teams across silos,<br>local performance measurement,<br>technical support,<br>success stories (small pilots)                                                                                                                                                                                                                                                                                                                                             |
| Kaplan HC, Provost LP, Froehle CM, et al. 2012 | 10 QI-experts identification based on review | QI, including Lean. Qualitative and quantitative studies | Contextual factors influencing QI success                                | External motivators (environmental pressure and incentives)<br>Project sponsorship (personnel, expertise, facilities from outside)<br>QI leadership (senior management board)<br>Senior leader project sponsor (to champion and support)<br>Culture support<br>Program maturity/sophistication of QI<br>Data infrastructure<br>Resource availability<br>Workforce QI focus/training/engaged<br>Micro system leadership (personally involved)<br>Culture support; teamwork, communication, freedom to improve<br>Capability (team ability to use QI methods)<br>Motivation/willingness<br>Team diversity<br>Physician involvement<br>Expert (subject matter)                      |

|                                               |                                  |                                                                       |                                                                                        |                                                                                                                                                                                                                                                                                                                                                                                                                                                            |
|-----------------------------------------------|----------------------------------|-----------------------------------------------------------------------|----------------------------------------------------------------------------------------|------------------------------------------------------------------------------------------------------------------------------------------------------------------------------------------------------------------------------------------------------------------------------------------------------------------------------------------------------------------------------------------------------------------------------------------------------------|
|                                               |                                  |                                                                       |                                                                                        | <ul style="list-style-type: none"> <li>Team tenure (worked as a team before)</li> <li>Prior QI experience</li> <li>Team leadership</li> <li>Team decision making processes</li> <li>Team norms of behavior</li> <li>Team QI skills</li> <li>Trigger (a specific event stimulates a new emphasis)</li> <li>Tasks strategic importance to the organization</li> </ul>                                                                                        |
| Kaplan HC, Brady PW, Dritz MC, et al 2010     | Review<br>47 articles            | QI including Lean. Observation, controlled design, meta-analysis.     | Factors important for QI success                                                       | <ul style="list-style-type: none"> <li>Leadership from top management/board</li> <li>Organizational culture</li> <li>Organizational structure (clinical integration across departments)</li> <li>Data infrastructure and information systems</li> <li>Years involved in QI (experience)</li> <li>Customer focus</li> <li>Physician involvement</li> <li>Micro system motivation to change</li> <li>Resources for QI</li> <li>QI team leadership</li> </ul> |
| Mazzocato P, Savage C, Brommels M et al. 2010 | review<br>33 articles            | Lean. Qualitative and quantitative.                                   | Contextual characteristics of relevance                                                | <ul style="list-style-type: none"> <li>Senior management involvement</li> <li>Work across functional divides</li> <li>Pursue value creation for patients</li> <li>Nurture long term holistic culture of CQI</li> <li>A need to improve</li> <li>A willingness to improve</li> </ul>                                                                                                                                                                        |
| Kim CS, Spahlinger DA, Kin JM et al. 2009     | UMHS-USA evaluasjon              | Lean. Qualitative and quantitative.                                   | Key factors                                                                            | <ul style="list-style-type: none"> <li>Expert guidance for initial efforts</li> <li>leadership - clinical champions and senior management support</li> <li>frontline worker engagement in the QI processes</li> <li>Use metrics to develop and track interventions</li> <li>Define a realistic project scope</li> </ul>                                                                                                                                    |
| Lukas CVD, Holmes SK, Cohen AB et al. 2007    | 12 healthcare system doc. review | QI including Lean Longitudinal case-studies, mixed method evaluation. | Interactive elements that appear critical to successful transformation of patient care | <ul style="list-style-type: none"> <li>Impetus to transform leadership commitment</li> <li>Actively engage staff in meaningful problem solving</li> <li>Alignment to achieve consistency of organization goals</li> <li>Integration to bridge traditional intra-organizational boundaries among individual components.</li> </ul>                                                                                                                          |
| Kollberg B, Dahlgaard JJ, Brehmer PO. 2007    | Unsystematic review              | QI including Lean. Qualitative and quantitative.                      | Critical success factors                                                               | <ul style="list-style-type: none"> <li>patient focus</li> <li>active involvement and</li> <li>multi-skilled teams</li> </ul>                                                                                                                                                                                                                                                                                                                               |



|                                         |                                                        |                                                                                   |                                                          |                                                                                                                                                                                                                                                                                                        |
|-----------------------------------------|--------------------------------------------------------|-----------------------------------------------------------------------------------|----------------------------------------------------------|--------------------------------------------------------------------------------------------------------------------------------------------------------------------------------------------------------------------------------------------------------------------------------------------------------|
|                                         |                                                        |                                                                                   |                                                          |                                                                                                                                                                                                                                                                                                        |
| Radnor ZJ, Holweg M, Waring J. 2012     | 4 multilevel studies NHS                               | Lean. Case studies including interviews                                           | -                                                        | holistic system approach, Understanding pathways across the organization. a culture of continuous QI, structured problem solving, understanding the underlying assumptions                                                                                                                             |
| Walshe K. 2009                          | Unsystematic review                                    | Lean Theoretical, qualitative and quantitative studies                            | -                                                        | Adoption of a QI method, stick with it; develop skills and experience, build up engagement, commitment Organizational capacity.                                                                                                                                                                        |
| Walshe K, Freeman T. 2002               | unsystematic review                                    | Lean. Research evaluations.                                                       | The determinants of effectiveness                        | Leadership, direction, culture, training, resources, Practical support.                                                                                                                                                                                                                                |
| Winch S, Henderson AJ. 2009             | Un-systematic review                                   | Lean. Qualitative and quantitative.                                               | -                                                        | teamwork, collaboration between health professionals and patients, Communication.                                                                                                                                                                                                                      |
| Øvretveit J, Gustafson D. 2002          | Un-systematic review and recommendation for evaluation | QI including Lean. Theoretical, qualitative and quantitative.                     | Conditions for effectiveness or critical success factors | Senior management commitment, sustained attention, the right type of management roles at different levels, focus on customer needs, physician involvement, sufficient resources, careful program management, practical and relevant training which personnel can use immediately, the right culture    |
| Morrow E, Robert G, Maben J et al. 2012 | Evaluation program NHS                                 | Productive ward (Lean). Mixed method evaluation including interviews and surveys. | Key facilitators                                         | Regional level support<br>Alignment with organizational targets<br>Clear vision, good information about the initiative<br>Dedicated project leadership<br>Strong support from senior staff (champions/steering groups)<br>External support (facilitation, networks)<br>Enthusiasm from middle managers |

1  
2  
3  
4  
5  
6  
7  
8  
9  
10  
11  
12  
13  
14  
15  
16  
17  
18  
19  
20  
21  
22  
23  
24  
25  
26  
27  
28  
29  
30  
31  
32  
33  
34  
35  
36  
37  
38  
39  
40  
41  
42  
43  
44  
45  
46  
47  
48  
49

|                                  |                     |                                     |                   |                                                                                                                                                                                                                                                                                                                                                                                                                                                         |
|----------------------------------|---------------------|-------------------------------------|-------------------|---------------------------------------------------------------------------------------------------------------------------------------------------------------------------------------------------------------------------------------------------------------------------------------------------------------------------------------------------------------------------------------------------------------------------------------------------------|
|                                  |                     |                                     |                   | <ul style="list-style-type: none"> <li>Communication and feedback to staff and patients</li> <li>Need for change, valuing the initiative</li> <li>Simple, practical solutions to real problems</li> <li>Accessibility of recourses and teaching modules</li> <li>Self-nomination (units to take part)</li> <li>Local ownership and empowerment</li> <li>Sufficient resources, support and time (staff cover)</li> </ul>                                 |
| Kim CS, MBA, DAS, Billi JE. 2009 | Unsystematic review | Lean. Qualitative and quantitative. | Critical Elements | <ul style="list-style-type: none"> <li>Senior management support.</li> <li>Expert guidance for their initial projects.</li> <li>A well-structured set of metrics, on a regular basis, readjusted</li> <li>Aligning individual goals, projects, and metrics</li> <li>Provide flexibility for frontline workers to experiment at the site and time they identify a problem.</li> <li>Frontline management need to avail themselves to the area</li> </ul> |

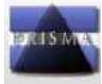

# PRISMA 2009 Checklist

| Section/topic                      | #  | Checklist item                                                                                                                                                                                                                                                                                              | Reported on page # |
|------------------------------------|----|-------------------------------------------------------------------------------------------------------------------------------------------------------------------------------------------------------------------------------------------------------------------------------------------------------------|--------------------|
| <b>TITLE</b>                       |    |                                                                                                                                                                                                                                                                                                             |                    |
| Title                              | 1  | Identify the report as a systematic review, meta-analysis, or both.                                                                                                                                                                                                                                         | 1                  |
| <b>ABSTRACT</b>                    |    |                                                                                                                                                                                                                                                                                                             |                    |
| Structured summary                 | 2  | Provide a structured summary including, as applicable: background; objectives; data sources; study eligibility criteria, participants, and interventions; study appraisal and synthesis methods; results; limitations; conclusions and implications of key findings; systematic review registration number. | 3                  |
| <b>INTRODUCTION</b>                |    |                                                                                                                                                                                                                                                                                                             |                    |
| Rationale                          | 3  | Describe the rationale for the review in the context of what is already known.                                                                                                                                                                                                                              | 1                  |
| Objectives                         | 4  | Provide an explicit statement of questions being addressed with reference to participants, interventions, comparisons, outcomes, and study design (PICOS).                                                                                                                                                  | 3                  |
| <b>METHODS</b>                     |    |                                                                                                                                                                                                                                                                                                             |                    |
| Protocol and registration          | 5  | Indicate if a review protocol exists, if and where it can be accessed (e.g., Web address), and, if available, provide registration information including registration number.                                                                                                                               | 4                  |
| Eligibility criteria               | 6  | Specify study characteristics (e.g., PICOS, length of follow-up) and report characteristics (e.g., years considered, language, publication status) used as criteria for eligibility, giving rationale.                                                                                                      | App1               |
| Information sources                | 7  | Describe all information sources (e.g., databases with dates of coverage, contact with study authors to identify additional studies) in the search and date last searched.                                                                                                                                  | 3                  |
| Search                             | 8  | Present full electronic search strategy for at least one database, including any limits used, such that it could be repeated.                                                                                                                                                                               | App1               |
| Study selection                    | 9  | State the process for selecting studies (i.e., screening, eligibility, included in systematic review, and, if applicable, included in the meta-analysis).                                                                                                                                                   | App1               |
| Data collection process            | 10 | Describe method of data extraction from reports (e.g., piloted forms, independently, in duplicate) and any processes for obtaining and confirming data from investigators.                                                                                                                                  | 4                  |
| Data items                         | 11 | List and define all variables for which data were sought (e.g., PICOS, funding sources) and any assumptions and simplifications made.                                                                                                                                                                       | 3                  |
| Risk of bias in individual studies | 12 | Describe methods used for assessing risk of bias of individual studies (including specification of whether this was done at the study or outcome level), and how this information is to be used in any data synthesis.                                                                                      | 12                 |
| Summary measures                   | 13 | State the principal summary measures (e.g., risk ratio, difference in means).                                                                                                                                                                                                                               | 4                  |
| Synthesis of results               | 14 | Describe the methods of handling data and combining results of studies, if done, including measures of consistency (e.g., $I^2$ for each meta-analysis)                                                                                                                                                     | 12                 |

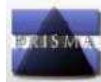

# PRISMA 2009 Checklist

Page 1 of 2

| Section/topic                 | #  | Checklist item                                                                                                                                                                                           | Reported on page # |
|-------------------------------|----|----------------------------------------------------------------------------------------------------------------------------------------------------------------------------------------------------------|--------------------|
| Risk of bias across studies   | 15 | Specify any assessment of risk of bias that may affect the cumulative evidence (e.g., publication bias, selective reporting within studies).                                                             | 12                 |
| Additional analyses           | 16 | Describe methods of additional analyses (e.g., sensitivity or subgroup analyses, meta-regression), if done, indicating which were pre-specified.                                                         | 4                  |
| <b>RESULTS</b>                |    |                                                                                                                                                                                                          |                    |
| Study selection               | 17 | Give numbers of studies screened, assessed for eligibility, and included in the review, with reasons for exclusions at each stage, ideally with a flow diagram.                                          | App1, 2            |
| Study characteristics         | 18 | For each study, present characteristics for which data were extracted (e.g., study size, PICOS, follow-up period) and provide the citations.                                                             | App2               |
| Risk of bias within studies   | 19 | Present data on risk of bias of each study and, if available, any outcome level assessment (see item 12).                                                                                                | 12                 |
| Results of individual studies | 20 | For all outcomes considered (benefits or harms), present, for each study: (a) simple summary data for each intervention group (b) effect estimates and confidence intervals, ideally with a forest plot. | -                  |
| Synthesis of results          | 21 | Present results of each meta-analysis done, including confidence intervals and measures of consistency.                                                                                                  | -                  |
| Risk of bias across studies   | 22 | Present results of any assessment of risk of bias across studies (see Item 15).                                                                                                                          | 12                 |
| Additional analysis           | 23 | Give results of additional analyses, if done (e.g., sensitivity or subgroup analyses, meta-regression [see Item 16]).                                                                                    | -                  |
| <b>DISCUSSION</b>             |    |                                                                                                                                                                                                          |                    |
| Summary of evidence           | 24 | Summarize the main findings including the strength of evidence for each main outcome; consider their relevance to key groups (e.g., healthcare providers, users, and policy makers).                     | 12                 |
| Limitations                   | 25 | Discuss limitations at study and outcome level (e.g., risk of bias), and at review-level (e.g., incomplete retrieval of identified research, reporting bias).                                            | 12                 |
| Conclusions                   | 26 | Provide a general interpretation of the results in the context of other evidence, and implications for future research.                                                                                  | 13                 |
| <b>FUNDING</b>                |    |                                                                                                                                                                                                          |                    |
| Funding                       | 27 | Describe sources of funding for the systematic review and other support (e.g., supply of data); role of funders for the systematic review.                                                               | 14                 |

From: Moher D, Liberati A, Tetzlaff J, Altman DG, The PRISMA Group (2009). Preferred Reporting Items for Systematic Reviews and Meta-Analyses: The PRISMA Statement. PLoS Med 6(6): e1000097. doi:10.1371/journal.pmed1000097

For more information, visit: [www.prisma-statement.org](http://www.prisma-statement.org).

Page 2 of 2  
For peer review only - <http://bmjopen.bmj.com/site/about/guidelines.xhtml>

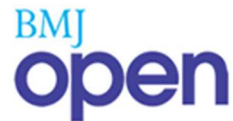

**Lean thinking in hospitals: Is there a cure for the absence of evidence?  
A systematic review of reviews**

|                                 |                                                                                                                                                                                                                                                                                                                                                                                                                                                                                                                                                                             |
|---------------------------------|-----------------------------------------------------------------------------------------------------------------------------------------------------------------------------------------------------------------------------------------------------------------------------------------------------------------------------------------------------------------------------------------------------------------------------------------------------------------------------------------------------------------------------------------------------------------------------|
| Journal:                        | <i>BMJ Open</i>                                                                                                                                                                                                                                                                                                                                                                                                                                                                                                                                                             |
| Manuscript ID:                  | bmjopen-2013-003873.R1                                                                                                                                                                                                                                                                                                                                                                                                                                                                                                                                                      |
| Article Type:                   | Research                                                                                                                                                                                                                                                                                                                                                                                                                                                                                                                                                                    |
| Date Submitted by the Author:   | 13-Dec-2013                                                                                                                                                                                                                                                                                                                                                                                                                                                                                                                                                                 |
| Complete List of Authors:       | Andersen, Hege; University Hospital of North Norway, CEO office; University of Tromsø, Department of sociology, political science and community planning. Faculty of humanities, social sciences and education<br>Røvik, Kjell Arne; University of Tromsø, Department of sociology, political science and community planning. Faculty of humanities, social sciences and education<br>Ingebrigtsen, Tor; University Hospital of North Norway, CEO office; University of New South Wales, Centre for clinical governance research. Australian institute of health innovation |
| <b>Primary Subject Heading</b>: | Health services research                                                                                                                                                                                                                                                                                                                                                                                                                                                                                                                                                    |
| Secondary Subject Heading:      | Health policy                                                                                                                                                                                                                                                                                                                                                                                                                                                                                                                                                               |
| Keywords:                       | Quality in health care < HEALTH SERVICES ADMINISTRATION & MANAGEMENT, Change management < HEALTH SERVICES ADMINISTRATION & MANAGEMENT, Organisational development < HEALTH SERVICES ADMINISTRATION & MANAGEMENT, Organisation of health services < HEALTH SERVICES ADMINISTRATION & MANAGEMENT                                                                                                                                                                                                                                                                              |
|                                 |                                                                                                                                                                                                                                                                                                                                                                                                                                                                                                                                                                             |

1  
2  
3 **Lean thinking in hospitals: Is there a cure for the absence of evidence?**  
4 **A systematic review of reviews**

5  
6 **Corresponding author:**  
7

8 Hege Andersen

9  
10 University Hospital of North Norway

11  
12 Box 100, 9038 Tromsø, Norway

13  
14 [Hege.andersen@unn.no](mailto:Hege.andersen@unn.no) Telephone no: +47 99530353 Fax: +47 77626041  
15

16 **Authors:**

17 Hege Andersen

18  
19 CEO office, University Hospital of North Norway, Tromsø Norway and

20  
21 Department of Sociology, Political Science, and Community Planning

22  
23 Faculty of Humanities, Social Sciences, and Education

24  
25 University of Tromsø, Norway.  
26

27 Kjell Arne Røvik

28  
29 Department of Sociology, Political Science, and Community Planning

30  
31 Faculty of Humanities, Social Sciences, and Education

32  
33 University of Tromsø, Norway.  
34

35 Tor Ingebrigtsen

36  
37 CEO office, University Hospital of North Norway, Tromsø Norway and

38  
39 Department of Clinical Medicine

40  
41 Faculty of Health Sciences

42  
43 University of Tromsø, Norway and

44  
45 Centre for Clinical Governance research

46  
47 Australian Institute of Health Innovation

48  
49 University of New South Wales, Sydney Australia

50 **Key words:**

51  
52 Lean thinking, quality improvement, health care, implementation, context

53  
54 **Word-count:** 3819  
55  
56  
57  
58  
59  
60

## ABSTRACT

**Objective:** Lean interventions aim to improve quality of health care by reducing waste and facilitate flow in work processes. There is conflicting evidence on the outcomes of lean thinking, with quantitative and qualitative studies often contradicting each other. We suggest that reviewing the literature within the approach of a new contextual framework can deepen our understanding of lean as a quality improvement method. This article theorizes the concept of context by establishing a two-dimensional conceptual framework acknowledging lean as complex social interventions, deployed in different organizational dimensions and domains. The specific aim of the study was to identify factors facilitating intended outcomes from lean interventions, and to understand when and how different facilitators contribute.

**Design:** A two-dimensional conceptual framework was developed by combining Shortell's *Dimensions of capability* with Walshes' *Domains of an intervention*. We then conducted a systematic review of lean review articles concerning hospitals, published in the period 2000-2012. The identified lean facilitators were categorized according to the intervention domains and dimensions of capability provided by the framework.

**Results:** We provide a framework emphasizing context by relating facilitators to domains and dimensions of capability. 23 factors enabling successful lean in hospitals were identified in the systematic review, whereby management and a supportive culture, training, accurate data, physicians and team involvement were most frequent.

**Conclusions:** In the absence of evidence, the two-dimensional framework, incorporating the context, may prove useful for future research on variation in outcomes from lean interventions. Findings from the review suggest that characteristics and local application of lean, in addition to strategic and cultural capability, should be given further attention in health care quality improvement.

## ARTICLE SUMMARY

### Article focus

- There is conflicting evidence on the outcomes of lean thinking in health care.
- Reviewing the literature within the approach of a new contextual framework can deepen our understanding of lean as a quality improvement method.
- Identifying factors facilitating intended outcomes from lean interventions, contribute to new knowledge on when and how lean interventions work.

### Key messages

- 23 factors enabling successful lean in hospitals are identified, whereby management and a supportive culture, training, accurate data, physicians and team involvement were most frequent.
- Characteristics of lean and local application, in addition to the organizations strategic and cultural capability, should be given further attention in health care quality improvement.
- In the absence of evidence, a framework incorporating the context may prove useful for future research on lean interventions.

### Strengths and limitations of this study

- This review of reviews sums up the major findings regarding facilitators for lean interventions in health care the latest decade.
- The immaturity of the research field makes it hard to find substantial evidence for effective lean interventions in health care.
- The fact that lean is social, complex and context-dependent interventions, call for a shift from cause-effect to conditional attributions in research.



## INTRODUCTION

Lean thinking has been introduced in health care during the latest decades as a quality improvement method[1]. Lean can be challenging to adopt in a medical environment, where professionals require evidence before taking action[2-4]. Researchers remark a profound gap and tension between the medical approach and lean thinking[5 6]. The call for scientific proof for lean as an efficient and effective quality improvement method is strong[7]. Lack of evidence may lead to resistance and hinder speed up and spread of quality initiatives in health care[1 8-10].

Lean interventions aim to improve quality by reducing waste and facilitate flow in care processes[11]. Lean techniques include value stream mapping of start-to-end processes, identification and elimination of activities that do not add value, and streamlining of value-adding activities[12]. Focus on measurements and continuous improvement is expected to promote implementation and sustainability.

In a recent review, Mazzocato et al. (2010) concluded that lean has been applied successfully in health care institutions worldwide[13]. However, most studies have a narrow technical application with limited organizational reach. Many are single case studies, some quite anecdotal, while others are biased or characterized by a weak study design. Some reviews suggest that inappropriate analyses, a lack of alternative hypotheses, and other methodological limitations undermine validity[2 5 14]. This makes it difficult to rule out confounding explanatory factors, to measure outcomes and generalize results from lean interventions[6].

Advocates for experimental designs question results from qualitative studies, and argues that randomized controlled trials are necessary to isolate effects[15 16]. Many studies using an experimental design did not find any significant effect of lean and other quality improvement interventions[1 2 6 9 10 17]. Experimental methods are not very helpful in understanding interventions' effectiveness because they rule out context, content, and application variables[9]. We cannot be sure that the specific intervention – and not other factors – produced the observed change[2 10].

The key problem is the adaption of study designs that do not allow drawing solid conclusions, particularly as they fail to take into account contingency factors that are needed to translate

1  
2  
3 findings from one setting to another. Is there a cure for this lack of evidence? On a paramount  
4 level, one must ask whether absence of evidence justifies inaction[18]. The *quality chasm*  
5 between the health care we have and the health care we should have is well documented[19  
6 20]. In other words, the call for action is still there, and, these obstacles to quality  
7  
8 improvement must be crossed.  
9

### 10 11 **Lean as social, complex and context-dependent interventions**

12 Shortell et al. (2007) emphasized the need to link evidence-based medicine and what they  
13 refer to as evidence-based management, arguing that medicine must take into account the  
14 complex organizational and social context in which care is delivered[21]. Such integration of  
15 the intervention and its context seldom happens in quality improvement research[22].  
16

17  
18 Lean interventions operate differently from the clinical interventions affecting biological  
19 systems, in which a linear cause-effect relationship controlling the influence of context is  
20 assumed. Context are simply defined as all surrounding factors that are not part of the  
21 intervention itself[8 23]. However, the boundaries between the intervention and its  
22 surroundings may be relatively arbitrary, as lean interventions are social, complex and  
23 inherently context-dependent[24 25]. Lean interventions consist of multiple, reciprocally  
24 interacting elements. They evolve over time in response to continuous feedback as situation  
25 dependent cumulative processes, and are therefore intrinsically unstable and difficult to  
26 standardize. Lean and other quality improvement methods are often adjusted, mixed,  
27 implemented and used simultaneously[5 10 26 27]. This fact challenges the strict distinction  
28 between lean and other quality improvement methods. Finally, lean interventions are open  
29 systems that feed back on themselves, so that with learning, they may change the conditions  
30 that made them work in the first place.  
31  
32

33  
34  
35  
36  
37  
38  
39  
40  
41  
42  
43 There is a growing literature on lean facilitators. According to Grimshaw et al, systematic  
44 reviews provide the best evidence on the effectiveness of quality improvement[28]. We  
45 observe a growing consensus that characteristics like management, resources and culture  
46 matter, but the current knowledge base lacks specification on when and how the different  
47 facilitators work. This vagueness partly rest on insufficient methodological attention to the  
48 context in which lean interventions work. To understand and assess variation in lean  
49 intervention success, there is a need for a conceptual framework defining facilitators for  
50 change at the stages and levels where they are activated. These facilitators, also named  
51 enablers, determinants for effectiveness and so on, may be defined as contingency factors  
52  
53  
54  
55  
56  
57  
58  
59  
60

1  
2  
3 which help the progress of lean interventions[8 22 29], and shift the focus from cause-effect  
4 to conditional attributions.  
5  
6

7  
8 The University Hospital of North Norway underwent a complex merger and restructuring  
9 process between 2007 and 2010[30]. An enterprise-wide lean program for improvement was  
10 launched. The program aimed to accomplish quality improvement in parallel with the  
11 organizational change to counteract the transitional setbacks in quality that large-scale change  
12 may entail[31]. A research program was established to evaluate the effects. The proposed  
13 framework represents a theoretical tool to understand more of how and when lean  
14 interventions work at the hospital. Our approach incorporates the complex social and  
15 organizational context in which the interventions are applied and the different stages of  
16 adoption. We suggest that the emerging knowledge could guide decision makers considering  
17 lean interventions, assessing the organizations' readiness for change[22 32]. The specific aim  
18 of the study was to identify contingency factors influencing intended outcomes of lean  
19 interventions, and to understand when and in which dimension different factors contribute.  
20  
21  
22  
23  
24  
25  
26  
27  
28

## 29 30 **METHODS**

31  
32 A systematic narrative review[33] of reviews of quality improvement in hospitals was  
33 conducted. One reviewer performed the systematic review, supervised by the two co-authors.  
34 Any confusion was resolved by discussion involving all three authors. The initial inclusion  
35 criteria were English language articles published in a peer-reviewed journal in the period  
36 2000-2012. Search words included hospital, health care, quality improvement, lean thinking,  
37 lean management, and review/evaluation. By searching Pubmed, Web of Science, Embase,  
38 Cochrane and Scopus, 251 articles were identified. A snowball approach was used to search  
39 for supplementary articles, adding 13 articles. 15 duplicate articles were removed. The titles  
40 and abstracts of these 249 articles were screened according to the *Prisma guidelines* for  
41 reporting reviews and meta analysis (supplementary file)[34]. 196 original articles were  
42 excluded. Exclusion criteria included absence of a hospital or organizational focus, single-unit  
43 case studies, and hybrid quality improvement approaches. As a result, 53 articles were  
44 assessed for eligibility. After a full-text review, another 35 articles were excluded by the  
45 criteria that neither large-scale quality improvement, success criteria or lean thinking were  
46 issued. Articles that mainly represented practical guidelines were also excluded. The final  
47 review included 18 articles[10 13 17 22 23 26 27 31 35-44].  
48  
49  
50  
51  
52  
53  
54  
55  
56  
57  
58  
59  
60

## Data analysis

The 18 articles were systematized according to the number of studies included in each review. Eight articles reviewed a number of definite cases, varying from four to 90 (median 33). The remaining articles were expert evaluations, narrative or unsystematic reviews, all covering lean interventions in hospitals. Half of the articles review only lean interventions, while the others include lean and corresponding methods like *Productive ward* and process oriented redesign. Lean was extracted and treated separately as far as possible, though confined by the observed mix, similarity and simultaneously use of different quality improvement methods in hospitals[5 22 26 27]. The methods used in the original studies were qualitative, quantitative, or a mixed-method approach. Most studies were based on cases originated in the United States, Australia and Great Britain.

The next step was to search for facilitators, defined as contingency factors predicted to promote quality improvement, as opposed to barriers that hinder improvement[37]. The decision to concentrate on facilitators and not barriers to lean improvement were based on the fact that the research literature at this field chiefly pays attention to facilitators and not barriers[5 8 10 13 17 22 23 38]. In most cases, the facilitators were quite easy to identify in the texts despite different annotations used, including *enablers, conditions, factors* and *key facilitators, critical elements, determinants of effectiveness, and contextual characteristics*. Using the method of feature maps, which enable localization of similarities and differences among studies[33], the articles were systematically analyzed and recorded in a standardized format, according to the facilitators. The procedure were conducted by creating a worksheet categorizing every paper according to author, year of publishing, kind of review, other quality improvement methods comprised (in addition to lean), research method, labelling of facilitators, and facilitating factors. The complete worksheet is attached as a supplementary file.

All the identified facilitators were assigned to larger categories. This classification was done to develop a more specific and practically focused state of knowledge concerning facilitators for lean thinking, as the need for an overview necessitated reducing the information to manageable amounts. All the identified facilitators concerning management and leadership were placed in the category *management*, covering subjects like management support, commitment and ownership. Cultural issues were all categorized as *supportive culture*,

1  
2  
3 including views, norms, beliefs and behaviours supporting the principles and practice of  
4 quality improvement. All facilitators concerning local translation were put in the category  
5 *adaptation*, as all facilitators dealing with prior involvement in quality improvement work were  
6 grouped under the heading *experience*, and so on. After examining all the 149 facilitators,  
7 grouping them with similar ones, we ended up with a list comprising 23 facilitators. The  
8 different facets of these facilitators are all listed in box 1 below. Finally, the frequency of each  
9 of the facilitators in the 18 reviews was accounted for.  
10  
11  
12  
13  
14

### 15 16 **A theoretical and methodological framework**

17 Lean interventions consist of several different phases, from planning and preparation to  
18 implementation and sustainability, involving different organizational capabilities. The  
19 facilitators for improvement were analyzed and reorganized in a table combining Shortell's  
20 *dimensions of capability*[245], and Walshe's *domains of an intervention*[9]. Shortell  
21 categorized improvement factors according to cultural, technical, strategic, and structural  
22 dimensions of an intervention. The *cultural* dimension refers to the underlying beliefs, values,  
23 norms and behaviours of the organization. The *technical* dimension covers training and  
24 information system issues, while the *strategic* dimension emphasizes the conditions that offer  
25 the greatest opportunities to change. This dimension touch upon the degree of integration of  
26 quality improvement in the hospital's strategic plans, and to which extent improvement efforts  
27 are devoted to processes central to strategic priorities. The *structural* dimension relate to  
28 mechanisms that facilitate learning and disseminate best practices throughout the  
29 organization. The four dimensions are multiplicative, interrelated, and equally necessary for  
30 lasting quality improvement according to Shortell. Varying lean success can be understood as  
31 a result of the interplay of dynamic processes related to the four dimensions[45].  
32  
33  
34  
35  
36  
37  
38  
39  
40  
41  
42  
43

44 Walshe's differentiated domains in quality interventions are labelled as context, content,  
45 application and outcomes. The context involves the situation, setting or organization in which  
46 the intervention is deployed. Context may vary widely, both within and between hospitals.  
47 The *content* describes the the nature or characteristics of the intervention itself. The content of  
48 lean may be standardized and repeatable or modified and easy to redesign. The *application*  
49 covers the process through which the intervention is delivered. This process may be protocol-  
50 driven or widely varying depending on local actors. *Outcomes* are the results of the  
51 intervention, including the maintenance phase after implementation. All of these domains may  
52 be characterized by low or high variance. High levels of variance in the settings, content and  
53  
54  
55  
56  
57  
58  
59  
60

1  
2  
3 application may explain interventions varying success. Variances also reduce the ability to  
4 generalize empirically, and to draw conclusions about effects from one specific context to  
5 another. The complex relationship between context, content, application and outcomes must  
6 be unpicked to develop a situational understanding of effectiveness[9].  
7  
8  
9

10  
11 By combining Shortell's dimensions and Walshe's domains, this two-dimensional framework  
12 made it possible to classify identified facilitators for quality improvement, both as emerging  
13 in different domains in a multistage process and by different organizational dimensions. The  
14 framework was used to describe and understand the contextual factors encountered in an  
15 organizational-wide quality improvement effort.  
16  
17  
18  
19

## 20 21 **RESULTS**

22  
23 Among the 18 reviewed articles, 149 facilitators for lean interventions were found. The  
24 reviews identified 3 to 16 (median seven) facilitators for improvement. All were identified in  
25 several reviews, varying from 3 to 14 (median seven) times. The facilitators were categorized  
26 into 23 extensive classes, covering the range of all the identified facilitators.  
27  
28  
29  
30  
31  
32  
33  
34  
35  
36  
37  
38  
39  
40  
41  
42  
43  
44  
45  
46  
47  
48  
49  
50  
51  
52  
53  
54  
55  
56  
57  
58  
59  
60

Box 1: Facilitators for change: description

**Adaption:** Local translation of the Lean intervention

**Measurement:** Audits local performance metrics on regular basis as evidence

**Holistic approach:** Lean as an entire value system, embracing every day improvement

**Belief:** In staff and patient benefits encourage willingness and motivation

**Experience:** Prior quality improvement using a successful, mature method

**Administrative support:** Practical facilitation by a project management

**Competence:** In tools, assumptions and methods assure capability

**Communication:** With and between patients and staff, including feedback to both

**Alignment:** Consistency to strategic objectives and priorities of strategic importance

**IT-systems:** Adequate IT support and infrastructure established

**Continuous improvement:** A long-term plan, securing endured and sustained attention

**System-wide scope:** Multifaceted interventions, across silos and functional divides

**Vision:** Targets of urgency and direction, but realistic, simple and practical solutions

**Customer focus:** Include patient and workforce value creation and improvements

**External support:** Expert change agents, networks and sponsorship triggers change

**Staff involvement:** Commitment, engagement, and empowerment by staff participation

**Resources:** Available, sufficient and accessible capacities

**Accurate data:** Robust and timely, evidence-based data as a impetus to change

**Physicians:** Clinical leadership and champions' engagement, support and collaboration

**Teamwork:** Multi-skilled and –disciplinary team collaboration including decision-making

**Training:** Accessible, substantial, practical and relevant training for immediate use

**Supportive culture:** Views, norms and beliefs that support quality improvement

**Management:** Leadership support, ownership and commitment

Figure 1 show how frequent the different facilitators were identified in the 18 reviews.

Figure 1: Frequency of different facilitators identified in 18 reviewed articles

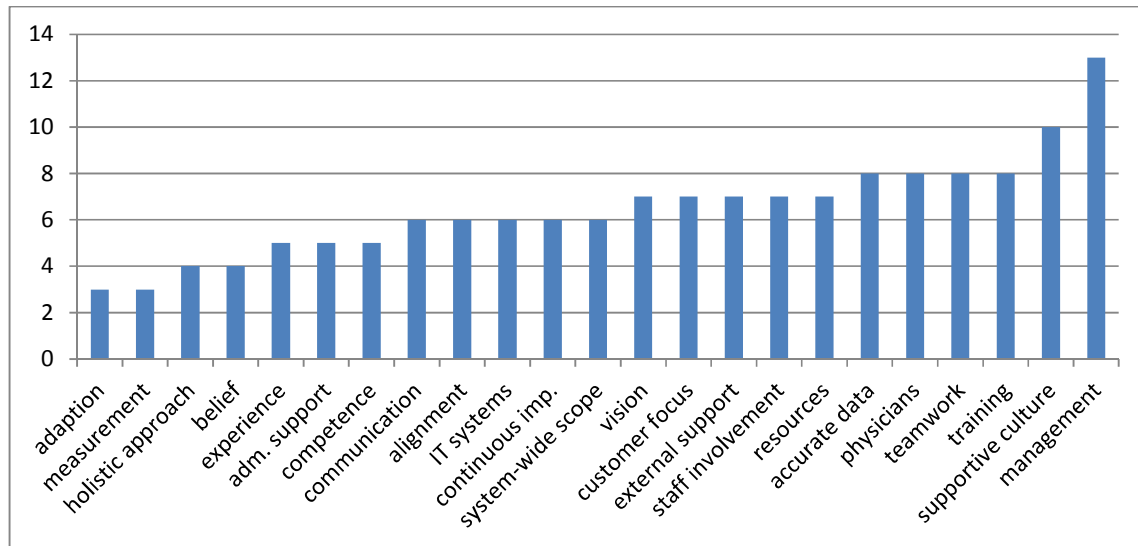

## DISCUSSION

Table 1 show how the different facilitators were found relevant in the different intervention domains and affected organizational dimensions.

Table 1: Facilitators for change, literature reviews 2000–2012

| <i>Dimensions of capability</i>                                                       | <i>Domain of the intervention</i>                   |                                                              |                                                     |                                                   |
|---------------------------------------------------------------------------------------|-----------------------------------------------------|--------------------------------------------------------------|-----------------------------------------------------|---------------------------------------------------|
|                                                                                       | <i>Context</i><br><i>Situation and organization</i> | <i>Content</i><br><i>Characteristics of the intervention</i> | <i>Application</i><br><i>Local delivery process</i> | <i>Outcomes</i><br><i>Results and maintenance</i> |
| <i>Cultural</i><br>Underlying beliefs, values, norms and behavior                     | Experience<br>Belief                                | Adaption<br>Customer focus                                   | Teamwork                                            | Supportive culture                                |
| <i>Technical</i><br>Training and info support systems                                 | IT systems<br>Competence                            | Training                                                     | Administrative support                              | Communication                                     |
| <i>Strategic</i><br>Strategic importance and opportunity to change                    | Alignment<br>Vision                                 | Resources                                                    | Physicians<br>Management                            | Holistic approach<br>Continuous improvement       |
| <i>Structural</i><br>Mechanisms to facilitate learning and disseminate best practices | External support                                    | Accurate data                                                | Staff involvement                                   | Measurement<br>System-wide scope                  |

**Context: Situation and organization.**



1  
2  
3 Prior experience, accompanied by success stories demonstrating benefits for patients and  
4 staff, enables improvement[23 31 37]. This relates to the organization's cultural capability  
5 and the influence of the underlying beliefs, values, norms, and behaviours. Motivation  
6 influences the willingness to participate[13 17 37 38 40 41 44]. IT-systems infrastructure and  
7 competence[17 23 31 36-38], as well as external experts sponsoring, strengthen the technical  
8 and structural capability. Sponsorship triggers learning and contribute to dissemination of best  
9 practices throughout the organization[17 31 35 38-40 44]. Competence in tools and methods  
10 support the assumptions of lean, and increase the potential for change[26 27 36 38].

11  
12  
13  
14  
15  
16 Ambitious targets aligned with the hospital's overall goals and strategies strengthen the  
17 strategic capability[17 31 36 38 41 44]. The goals have to be of strategic importance, but at  
18 the same time realistic, based on simple and practical solutions[17 22 31 36 40 44].  
19  
20  
21

### 22 23 **Content: Characteristics of the intervention**

24  
25 Adaption and translation to local conditions are a precondition for success[26 35 37]. A  
26 methodology communicating a clear patient and workforce focus supports the cultural  
27 dimension. Emphasis on patient processes, value creation, and patient needs facilitate quality  
28 improvement in health care[10 13 23 35 37 42 44]. Access to, and accomplished substantial  
29 training in methods and tools strengthens the organizations technical capability[10 17 22 26  
30 31 35 36 38 44], as sufficient and available resources, financial as well as staff time, affect the  
31 strategic dimension[10 17 22 23 31 35 36 38 44]. On the structural dimension, accurate and  
32 robust data represent an impetus to learning and spread of best practices. Timely data  
33 contribute to an evidence-based quality improvement initiative[13 17 36 37 39 40 44].  
34  
35  
36  
37  
38  
39  
40  
41  
42  
43  
44  
45  
46  
47  
48  
49  
50  
51  
52  
53  
54  
55  
56  
57  
58  
59  
60  
61  
62  
63  
64  
65  
66  
67  
68  
69  
70  
71  
72  
73  
74  
75  
76  
77  
78  
79  
80  
81  
82  
83  
84  
85  
86  
87  
88  
89  
90  
91  
92  
93  
94  
95  
96  
97  
98  
99  
100  
101  
102  
103  
104  
105  
106  
107  
108  
109  
110  
111  
112  
113  
114  
115  
116  
117  
118  
119  
120  
121  
122  
123  
124  
125  
126  
127  
128  
129  
130  
131  
132  
133  
134  
135  
136  
137  
138  
139  
140  
141  
142  
143  
144  
145  
146  
147  
148  
149  
150  
151  
152  
153  
154  
155  
156  
157  
158  
159  
160  
161  
162  
163  
164  
165  
166  
167  
168  
169  
170  
171  
172  
173  
174  
175  
176  
177  
178  
179  
180  
181  
182  
183  
184  
185  
186  
187  
188  
189  
190  
191  
192  
193  
194  
195  
196  
197  
198  
199  
200  
201  
202  
203  
204  
205  
206  
207  
208  
209  
210  
211  
212  
213  
214  
215  
216  
217  
218  
219  
220  
221  
222  
223  
224  
225  
226  
227  
228  
229  
230  
231  
232  
233  
234  
235  
236  
237  
238  
239  
240  
241  
242  
243  
244  
245  
246  
247  
248  
249  
250  
251  
252  
253  
254  
255  
256  
257  
258  
259  
260  
261  
262  
263  
264  
265  
266  
267  
268  
269  
270  
271  
272  
273  
274  
275  
276  
277  
278  
279  
280  
281  
282  
283  
284  
285  
286  
287  
288  
289  
290  
291  
292  
293  
294  
295  
296  
297  
298  
299  
300  
301  
302  
303  
304  
305  
306  
307  
308  
309  
310  
311  
312  
313  
314  
315  
316  
317  
318  
319  
320  
321  
322  
323  
324  
325  
326  
327  
328  
329  
330  
331  
332  
333  
334  
335  
336  
337  
338  
339  
340  
341  
342  
343  
344  
345  
346  
347  
348  
349  
350  
351  
352  
353  
354  
355  
356  
357  
358  
359  
360  
361  
362  
363  
364  
365  
366  
367  
368  
369  
370  
371  
372  
373  
374  
375  
376  
377  
378  
379  
380  
381  
382  
383  
384  
385  
386  
387  
388  
389  
390  
391  
392  
393  
394  
395  
396  
397  
398  
399  
400  
401  
402  
403  
404  
405  
406  
407  
408  
409  
410  
411  
412  
413  
414  
415  
416  
417  
418  
419  
420  
421  
422  
423  
424  
425  
426  
427  
428  
429  
430  
431  
432  
433  
434  
435  
436  
437  
438  
439  
440  
441  
442  
443  
444  
445  
446  
447  
448  
449  
450  
451  
452  
453  
454  
455  
456  
457  
458  
459  
460  
461  
462  
463  
464  
465  
466  
467  
468  
469  
470  
471  
472  
473  
474  
475  
476  
477  
478  
479  
480  
481  
482  
483  
484  
485  
486  
487  
488  
489  
490  
491  
492  
493  
494  
495  
496  
497  
498  
499  
500  
501  
502  
503  
504  
505  
506  
507  
508  
509  
510  
511  
512  
513  
514  
515  
516  
517  
518  
519  
520  
521  
522  
523  
524  
525  
526  
527  
528  
529  
530  
531  
532  
533  
534  
535  
536  
537  
538  
539  
540  
541  
542  
543  
544  
545  
546  
547  
548  
549  
550  
551  
552  
553  
554  
555  
556  
557  
558  
559  
560  
561  
562  
563  
564  
565  
566  
567  
568  
569  
570  
571  
572  
573  
574  
575  
576  
577  
578  
579  
580  
581  
582  
583  
584  
585  
586  
587  
588  
589  
590  
591  
592  
593  
594  
595  
596  
597  
598  
599  
600  
601  
602  
603  
604  
605  
606  
607  
608  
609  
610  
611  
612  
613  
614  
615  
616  
617  
618  
619  
620  
621  
622  
623  
624  
625  
626  
627  
628  
629  
630  
631  
632  
633  
634  
635  
636  
637  
638  
639  
640  
641  
642  
643  
644  
645  
646  
647  
648  
649  
650  
651  
652  
653  
654  
655  
656  
657  
658  
659  
660  
661  
662  
663  
664  
665  
666  
667  
668  
669  
670  
671  
672  
673  
674  
675  
676  
677  
678  
679  
680  
681  
682  
683  
684  
685  
686  
687  
688  
689  
690  
691  
692  
693  
694  
695  
696  
697  
698  
699  
700  
701  
702  
703  
704  
705  
706  
707  
708  
709  
710  
711  
712  
713  
714  
715  
716  
717  
718  
719  
720  
721  
722  
723  
724  
725  
726  
727  
728  
729  
730  
731  
732  
733  
734  
735  
736  
737  
738  
739  
740  
741  
742  
743  
744  
745  
746  
747  
748  
749  
750  
751  
752  
753  
754  
755  
756  
757  
758  
759  
760  
761  
762  
763  
764  
765  
766  
767  
768  
769  
770  
771  
772  
773  
774  
775  
776  
777  
778  
779  
780  
781  
782  
783  
784  
785  
786  
787  
788  
789  
790  
791  
792  
793  
794  
795  
796  
797  
798  
799  
800  
801  
802  
803  
804  
805  
806  
807  
808  
809  
810  
811  
812  
813  
814  
815  
816  
817  
818  
819  
820  
821  
822  
823  
824  
825  
826  
827  
828  
829  
830  
831  
832  
833  
834  
835  
836  
837  
838  
839  
840  
841  
842  
843  
844  
845  
846  
847  
848  
849  
850  
851  
852  
853  
854  
855  
856  
857  
858  
859  
860  
861  
862  
863  
864  
865  
866  
867  
868  
869  
870  
871  
872  
873  
874  
875  
876  
877  
878  
879  
880  
881  
882  
883  
884  
885  
886  
887  
888  
889  
890  
891  
892  
893  
894  
895  
896  
897  
898  
899  
900  
901  
902  
903  
904  
905  
906  
907  
908  
909  
910  
911  
912  
913  
914  
915  
916  
917  
918  
919  
920  
921  
922  
923  
924  
925  
926  
927  
928  
929  
930  
931  
932  
933  
934  
935  
936  
937  
938  
939  
940  
941  
942  
943  
944  
945  
946  
947  
948  
949  
950  
951  
952  
953  
954  
955  
956  
957  
958  
959  
960  
961  
962  
963  
964  
965  
966  
967  
968  
969  
970  
971  
972  
973  
974  
975  
976  
977  
978  
979  
980  
981  
982  
983  
984  
985  
986  
987  
988  
989  
990  
991  
992  
993  
994  
995  
996  
997  
998  
999  
1000

1  
2  
3 44]. Physicians represent champions and clinical leadership, and their involvement,  
4 engagement, and collaboration are important at the strategic level as role models and peers for  
5 others[10 17 23 31 36 38 40 43]. Both management and physicians involvement are among  
6 the most frequent identified enablers jointly with teamwork. Key factors to disseminate best  
7 practices are staff participation, engagement, and empowerment. Staff commitment,  
8 responsibility and ownership, are required for achieving lasting outcomes [26 35 38-42 44].  
9  
10  
11  
12

### 13 **Outcomes: Results and maintenance**

14  
15 To secure maintenance, a hospital depends first and foremost on a supportive culture  
16 characterized by norms, beliefs and behaviours supporting the principles and practice of  
17 quality improvement [10 22 23 35-38]. In a supportive culture, employees feel that they can  
18 make use of their skills and creativity, take initiative, and cause things to happen [35]. At the  
19 technical dimension, communication and feedback between patients and staff are enablers [31  
20 35 38 43 44]. Strategically, a holistic approach based on continuous improvement and  
21 sustained attention affect the ability to accomplish change. A holistic approach emphasizes  
22 that lean is a strategy not only to promote everyday improvement but also a philosophy of  
23 ongoing quality improvement within the hospital's value system[13 17 27 35 41]. A long-  
24 term plan should be established to secure continuous improvement[10 13 17 26 27 37]. Local  
25 audits and measurements conducted on a regular basis relate to the organization's structural  
26 capability, which strengthen the evidence for lean interventions[36 37 39 40]. A system-wide  
27 multifaceted approach, across functional divides, allows best practices to be learned and  
28 disseminated.  
29  
30  
31  
32  
33  
34  
35  
36  
37  
38  
39  
40

41 Analysis based on the conceptual framework suggest that understanding which facilitators  
42 influence the intervention at different domains and dimensions of capability, is probably more  
43 important than a quantitative approach[8 17]. This represent a shift from cause-effect to  
44 conditional attributions[45]. Each domain and dimension is influenced by the status of other  
45 ones. Our results summarized in table 1 indicate that a number of facilitators may interact  
46 within and between the domains and dimensions. The four dimensions, domains and the  
47 associated facilitators are interrelated and probably all necessary to achieve lasting results[2].  
48 Finally, we elaborate our interpretation of these findings.  
49  
50  
51  
52  
53  
54

55  
56 Our analyses of data from previous review articles within this new framework show that  
57 successful lean interventions share some common features. We identified 23 facilitators  
58  
59  
60

1  
2  
3 associated with successful interventions. Unfortunately, little is known about which facilitators  
4 that are most important[8 22]. Management and leadership engagement was identified as  
5 important by 13 of the 18 reviewed reviews. The other facilitators most frequently identified  
6 were a supportive culture, accurate data and training, along with physician and team  
7 involvement. This is in accordance with the conclusions from relevant research, and may  
8 indicate that these facilitators are vital to accomplish quality improvement[13 23 31 35]. Two  
9 recent reviews conclude that leadership, culture, maturity, and data infrastructure have a  
10 stronger evidence base than other factors[23 38]. Our results nevertheless suggest that  
11 successful interventions must utilise multiple facilitators from the four dimensions of  
12 capability, interplaying as the change processes touch upon the different domains. The  
13 observation that the facilitators identified in this study were in accordance with those  
14 promoted in other, broader theories of implementation concerning uptake of evidence and  
15 innovations in health care[4 23 46] strengthen the findings.

16  
17  
18  
19  
20  
21  
22  
23  
24  
25  
26 The most frequent facilitators belong to the *content* or *application* part of the intervention.  
27 This may indicate that policymakers should pay special attention to the content of lean and the  
28 local delivery process. Sufficient resources, accurate data and training are crucial for lean  
29 interventions to succeed. Lean are not a recipe that can be implemented locally if the training  
30 or available resources are inadequate. The need for local resource allocation should not be  
31 underestimated. This is in accordance to Radnor et al (2012), that advocate that lean  
32 interventions must be contextualized, rather than transplanted like a recipe[27].

33  
34  
35  
36  
37  
38  
39 This assertion is supported by the frequently identified facilitators labelled physicians and  
40 management. Leadership and clinical leadership are keys to understand why, or why not, lean  
41 interventions make contributions to health care[47]. Finally, the local application of lean in  
42 hospitals depends heavily on teamwork by multi-skilled and multidisciplinary teams. Work-  
43 floor staff must be engaged and empowered. Womack and Jones (2003) that initially  
44 advocated lean thinking in healthcare, emphasized the multi-skilled teams as a main  
45 advantage for hospitals, making lean suitable for health care[12].

46  
47  
48  
49  
50  
51  
52  
53 The cultural and strategic dimensions of capability embrace most of the frequent facilitators.  
54 A supportive culture are fundamental to achieve quality improvements[38]. The  
55 organizational culture and the strategic importance of the patient path exposed to the  
56 improvement initiative are essential to understand variation in outcomes of lean interventions.  
57  
58  
59  
60

1  
2  
3 Available resources, physicians and managements involvement, indicate and affect the  
4 strategic importance and thereby the opportunity to change. These findings are supported by  
5 other recent hospital-based studies, like Rozenblum et al (2013)[47].  
6  
7  
8  
9

### 10 11 **Limitations**

12 Making these interpretations from a systematic review of reviews must take the methods'  
13 limitations into consideration. The facilitators were grouped with similar ones, and sometimes  
14 renamed, risking that the original meaning could be misread and mistranslated by our  
15 interpretation. Transparency are promoted by conducting feature maps and presenting all the  
16 identified facilitators in appendices.  
17

18 It could be argued that facilitators identified in large reviews should be given more weight  
19 than those identified in smaller ones. However, our analysis identified the same facilitators  
20 across small and large reviews. Therefore, weighting was not conducted, even though we  
21 suggest that facilitators identified in many studies are significant.  
22

23 Including both qualitative and quantitative studies eliminates the possibility of quantifying the  
24 findings and predicting effects of the various facilitators by meta-analysis. The inclusion of  
25 both types of studies broadens the scope, increase the ability to identify an ampler spectre of  
26 facilitators, and contribute to understanding the role of context in lean interventions.  
27

### 28 29 30 31 32 33 34 35 36 **Directions for future research**

37 A critical review concluded that most of the research on hospital quality is dominated by  
38 questions of *what* and does not go further to investigate the *how*, *when*, and *why*[48]. They  
39 called for approaches that incorporate structure, process, and outcomes. The fact that we  
40 know so little about the relationship between these, makes it difficult to recommend ways of  
41 organizing that could improve patient care[49].  
42  
43  
44  
45  
46

47 The facilitators identified and the two-dimensional framework proposed in the present work  
48 incorporates structure and process. Still, the facilitators are characterized by vagueness, as  
49 broad and comprehensive determinants, that needs further specification and practical content  
50 to guide future effective quality improvements to health care organizations[8 22 38 50]. In  
51 addition to contextual preconditions, success are dependent on how the organization utilize,  
52 combine and sequence organizational resources and routines[32]. A logical next step will be  
53 to measure and analyse outcomes in the context of this framework, with the identified  
54  
55  
56  
57  
58  
59  
60

1  
2  
3 facilitators as explanatory variables. Possible measures of outcomes could be related to the  
4 health care providers performance (adherence to recommended practice), patient outcome (as  
5 quality of life or mortality), surrogate outcomes (as readmission) and organizational outcomes  
6 (like resource use or sustainability)[36]. At the University Hospital of North Norway, more  
7 than five years of lean experience and more than 20 implemented lean interventions leave us  
8 with a sufficient amount of empirically based cases to assess due to varying success.  
9  
10  
11  
12

## 13 14 15 **CONCLUSION**

16  
17 The findings contribute to reduce the gap between theory and practice, by a shift in focus  
18 from cause-effect to conditional attributes or characteristics of an effective organization-wide  
19 quality intervention. The review of reviews identified 23 interrelated facilitators for lean in  
20 hospitals, where management engagement, cultural support, accurate data and training, along  
21 with teamwork, physician and staff involvement were most frequent. The findings suggest  
22 that characteristics of lean and the local application should be given attention, in addition to  
23 the organizations' cultural and strategic capability.  
24  
25  
26  
27

28 The main contribution of this review is a two-dimensional framework for identification and  
29 analysis of facilitators for lean interventions in health care. This framework incorporates the  
30 complex social and organizational context in which lean are applied. These findings coincide  
31 with recent research calling for more attention to the influence of organizational context when  
32 trying to understand variance in interventions in healthcare[23]. We suggest that it will prove  
33 useful in future research aiming for a better understanding of how the likelihood to  
34 accomplish success in lean interventions can be increased[14]. The framework will also be  
35 used in future research locally at the hospital, as a practical tool to assess variation in adoption  
36 of lean.  
37  
38  
39  
40  
41  
42  
43  
44  
45  
46  
47  
48  
49  
50  
51  
52  
53  
54  
55  
56  
57  
58  
59  
60

1  
2  
3 Acknowledgements: The authors would like to thank David Greenfield (PhD) and John  
4 Øvretveit (PhD) for their assistance in clarifying concepts in the discussion. We would also  
5 like to thank James Morrison for his language assistance.  
6

7  
8 Contributors: All the listed authors met the authorship requirements as defined by the ICJME.  
9 HA contributed to the conception and design, the acquisition, analysis and interpretation of  
10 the data, as well as drafting and revising the article. TI and KAR made a substantial  
11 contribution to the design and interpretation of the data, as well as to drafting and critical  
12 revising of the article. All the authors have provided final approval of the submitted  
13 manuscript.  
14

15  
16 Funding: The PhD-study is founded by the regional health trust of North Norway, Helse Nord  
17 RHF  
18

19 Competing interest: None  
20  
21  
22  
23  
24  
25  
26  
27  
28  
29  
30  
31  
32  
33  
34  
35  
36  
37  
38  
39  
40  
41  
42  
43  
44  
45  
46  
47  
48  
49  
50  
51  
52  
53  
54  
55  
56  
57  
58  
59  
60

1. Joosten T, Bongers I, Janssen R. Application of lean thinking to health care: issues and observations. *International Journal for Quality in Health Care* 2009;**21**(5):341-47
2. Shortell SM. *Assessing the Implementation and Impact of Clinical Quality Improvement Efforts: Abstract, Executive Summary and Final Report*. Agency for Health Care Policy and Research, 1998.
3. Shojania KG, Grimshaw JM. Evidence-based quality improvement: the state of the science. *Health Affairs* 2005;**24**(1):138-50
4. Rycroft-Malone J, Kitson A, Harvey G, et al. Ingredients for change: revisiting a conceptual framework. *Quality & Safety in Health Care* 2002;**11**:174 - 80
5. Young T, McClean S. A critical look at Lean Thinking in healthcare. *Quality and Safety in Health Care* 2008;**17**(5):382-86
6. Alexander JA, Hearld LR. What Can We Learn From Quality Improvement Research? A Critical Review of Research Methods. *Medical Care Research and Review* 2009 doi: 10.1177/1077558708330424[published Online First: Epub Date].
7. de Souza LB. Trends and approaches in lean healthcare. *Leadership in Health Services* 2009;**22**(2):121-39
8. Øvretveit J. Understanding the conditions for improvement: research to discover which context influences affect improvement success. *BMJ quality & safety* 2011;**20**(Suppl 1):i18-i23
9. Walshe K. Understanding what works—and why—in quality improvement: the need for theory-driven evaluation. *International Journal for Quality in Health Care* 2007;**19**(2):57-59
10. Øvretveit J, Gustafson D. Evaluation of quality improvement programmes. *Quality and Safety in Health Care* 2002;**11**(3):270-75
11. Liker JK, Kaisha TJKK. *The Toyota way: 14 management principles from the world's greatest manufacturer*. McGraw-Hill New York, 2004.
12. Womack JP, Jones DT. *Lean thinking: banish waste and create wealth in your corporation, revised and updated*. Free Press, 2003.
13. Mazzocato P, Savage C, Brommels M, et al. Lean thinking in healthcare: a realist review of the literature. *Quality and Safety in Health Care* 2010;**19**(5):376-82
14. Vest JR, Gamm LD. A critical review of the research literature on Six Sigma, Lean and studergroup's hardwiring excellence in the United States: the need to demonstrate and communicate the effectiveness of transformation strategies in healthcare. *Implement Sci* 2009;**4**(35):1-9
15. Craig P, Dieppe P, Macintyre S, et al. Developing and evaluating complex interventions: the new Medical Research Council guidance. *BMJ* 2008;**337**(sep29\_1):a1655-a55
16. Perneger T. Ten reasons to conduct a randomized study in quality improvement. *International Journal for Quality in Health Care* 2006;**18**(6):395-96
17. Powell A, Rushmer R, Davies H. A systematic narrative review of quality improvement models in health care. *Social Dimensions of Health Institute at The Universities of Dundee and St Andrews* 2008
18. Altman DG, Bland JM. Statistics notes: Absence of evidence is not evidence of absence. *BMJ* 1995;**311**(7003):485 doi: 10.1136/bmj.311.7003.485[published Online First: Epub Date].
19. Corrigan JM. *Crossing the quality chasm*. Washington, DC, National Academy Press, 2001.
20. Kohn LT, Corrigan J, Donaldson MS. *To err is human: building a safer health system*. Joseph Henry Press, 2000.
21. Shortell SM, Rundall TG, Hsu J. Improving patient care by linking evidence-based medicine and evidence-based management. *JAMA: the journal of the American Medical Association* 2007;**298**(6):673-76
22. Walshe K, Freeman T. Effectiveness of quality improvement: learning from evaluations. *Quality and Safety in Health Care* 2002;**11**(1):85-87
23. KAPLAN HC, BRADY PW, DRITZ MC, et al. The influence of context on quality improvement success in health care: a systematic review of the literature. *Milbank Quarterly* 2010;**88**(4):500-59
24. Davidoff F. Systems of service: reflections on the moral foundations of improvement. *BMJ quality & safety* 2011;**20**(Suppl 1):i5-i10
25. Pawson R, Greenhalgh T, Harvey G, et al. Realist review—a new method of systematic review designed for complex policy interventions. *Journal of health services research & policy* 2005;**10**(suppl 1):21-34
26. Walshe K. Pseudoinnovation: the development and spread of healthcare quality improvement methodologies. *International Journal for Quality in Health Care* 2009;**21**(3):153-59
27. Radnor ZJ, Holweg M, Waring J. Lean in healthcare: The unfilled promise? *Social Science & Medicine* 2012;**74**(3):364-71
28. Grimshaw J, McAuley L, Bero L, et al. Systematic reviews of the effectiveness of quality improvement strategies and programmes. *Quality and safety in health care* 2003;**12**(4):298-303

- 1
- 2
- 3 29. Shortell SM, Bennett CL, Byck GR. Assessing the impact of continuous quality improvement on clinical
- 4 practice: what it will take to accelerate progress. *Milbank Quarterly* 2001;**76**(4):593-624
- 5 30. Ingebrigtsen T, Lind M, Krogh T, et al. Merging of three hospitals into one university hospital. *Tidsskrift for*
- 6 *den Norske lægeforening: tidsskrift for praktisk medicin, ny række* 2012;**132**(7):813
- 7 31. Vos L, Chalmers SE, Dücker MLA, et al. Towards an organisation-wide process-oriented organisation of
- 8 care: A literature review. *Implementation Science* 2011;**6**(1):8
- 9 32. Weiner BJ. A theory of organizational readiness for change. *Implement Sci* 2009;**4**(1):67
- 10 33. Hart C. *Doing a literature review*. London: Sage Publications, 1998.
- 11 34. Moher D, Liberati A, Tetzlaff J, et al. Preferred reporting items for systematic reviews and meta-analyses:
- 12 the PRISMA statement. *PLoS medicine* 2009;**6**(7):e1000097
- 13 35. Poksinska B. The current state of Lean implementation in health care: literature review. *Quality Management*
- 14 *in Healthcare* 2010;**19**(4):319
- 15 36. Brennan S, McKenzie J, Whitty P, et al. Continuous quality improvement: effects on professional practice
- 16 and healthcare outcomes. *The Cochrane Library* 2009
- 17 37. de Souza LB, Pidd M. Exploring the barriers to lean health care implementation. *Public Money &*
- 18 *Management* 2011;**31**(1):59-66
- 19 38. Kaplan HC, Provost LP, Froehle CM, et al. The Model for Understanding Success in Quality (MUSIQ):
- 20 building a theory of context in healthcare quality improvement. *BMJ quality & safety* 2012;**21**(1):13-20
- 21 39. Kim CS, MBA DAS, Billi JE. Creating value in health care: the case for lean thinking. *JCOM* 2009;**16**(12)
- 22 40. Kim CS, Spahlinger DA, Kin JM, et al. Implementation of Lean Thinking: one health system's journey. *Joint*
- 23 *Commission Journal on Quality and Patient Safety* 2009;**35**(8):406-13
- 24 41. Lukas CVD, Holmes SK, Cohen AB, et al. Transformational change in health care systems: an
- 25 organizational model. *Health care management review* 2007;**32**(4):309-20
- 26 42. Kollberg B, Dahlgard JJ, Brehmer PO. Measuring lean initiatives in health care services: Issues and
- 27 findings. *International Journal of Productivity and Performance Management* 2007;**56**(1):7-24
- 28 43. Winch S, Henderson AJ. Making cars and making health care: a critical review. *Medical Journal of Australia*
- 29 2009;**191**(7):415
- 30 44. Morrow E, Robert G, Maben J, et al. Emerald Article: Implementing large-scale quality improvement:
- 31 Lessons pyfromTheProductiveWard: ReleasingTimetoCare! *Quality Assurance* 2012;**25**(4):237-53
- 32 45. O'Brien JL, Shortell SM, Hughes EF, et al. An integrative model for organization-wide quality improvement:
- 33 lessons from the field. *Quality Management in Healthcare* 1995;**3**(4):19-30
- 34 46. Greenhalgh T, Robert G, Macfarlane F, et al. Diffusion of innovations in service organizations: systematic
- 35 review and recommendations. *Milbank Quarterly* 2004;**82**(4):581-629
- 36 47. Rozenblum R, Lisby M, Hockey PM, et al. The patient satisfaction chasm: the gap between hospital
- 37 management and frontline clinicians. *BMJ quality & safety* 2013;**22**(3):242-50
- 38 48. Hearld LR, Alexander JA, Fraser I, et al. Review: how do hospital organizational structure and processes
- 39 affect quality of care? A critical review of research methods. *Medical Care Research and Review*
- 40 2008;**65**(3):259-99
- 41 49. West E. Management matters: the link between hospital organisation and quality of patient care. *Quality in*
- 42 *Health Care* 2001;**10**(1):40-48
- 43 50. Bate P, Mendel P, Robert GB. *Organizing for quality: the improvement journeys of leading hospitals in*
- 44 *Europe and the United States*: Radcliffe Publishing, 2008.
- 45
- 46
- 47
- 48
- 49
- 50
- 51
- 52
- 53
- 54
- 55
- 56
- 57
- 58
- 59
- 60



1  
2  
3  
4  
5  
6  
7 **Lean thinking in hospitals: Is there a cure for the absence of evidence?**  
8 **A systematic review of reviews**

9  
10 **Corresponding author:**

11 Hege Andersen

12 University Hospital of North Norway

13 Box 100, 9038 Tromsø, Norway

14 [Hege.andersen@unn.no](mailto:Hege.andersen@unn.no) Telephone no: +47 99530353 Fax: +47 77626041

Field Code Changed

15  
16  
17  
18 **Authors:**

19 Hege Andersen

20 CEO office, University Hospital of North Norway, Tromsø Norway and

21 Department of Sociology, Political Science, and Community Planning

22 Faculty of Humanities, Social Sciences, and Education

23 University of Tromsø, Norway.

24 Kjell Arne Røvik

25 Department of Sociology, Political Science, and Community Planning

26 Faculty of Humanities, Social Sciences, and Education

27 University of Tromsø, Norway.

28 Tor Ingebrigtsen

29 CEO office, University Hospital of North Norway, Tromsø Norway and

30 Department of Clinical Medicine

31 Faculty of Health Sciences

32 University of Tromsø, Norway and

33 Centre for Clinical Governance research

34 Australian Institute of Health Innovation

35 University of New South Wales, Sydney Australia

36  
37  
38  
39  
40  
41  
42  
43  
44  
45  
46  
47 **Key words:**

48 Lean thinking, quality improvement, health care, implementation, context

49  
50 | **Word-count:** ~~3926~~ 3819

51  
52  
53  
54  
55  
56  
57 1  
58  
59  
60

## ABSTRACT

**Objective:** Lean interventions aim to improve quality of health care by reducing waste, and facilitate flow in work processes. There is conflicting evidence on the outcomes of lean thinking, with quantitative and qualitative studies often contradicting each other. We suggest that reviewing the literature within the approach of a new contextual framework can deepen our understanding of lean as a quality improvement method. This article theorizes the concept of context by establishing a two-dimensional conceptual framework acknowledging lean as complex social interventions, deployed ~~during several stages, and~~ in different organizational dimensions and domains. The specific aim of the study was to identify factors facilitating intended outcomes from lean interventions, and to understand when and ~~in which~~ dimension how different facilitators contribute.

**Design:** A two-dimensional conceptual framework was developed by combining Shortell's *Dimensions of capability* with Walshes' *Domains of an intervention*. We then conducted a systematic review of lean review articles concerning hospitals, published in the period 2000-2012. The identified lean facilitators were categorized according to the intervention ~~phases~~ domains and dimensions of capability provided by the framework.

**Results:** We provide a framework emphasizing context by relating facilitators to ~~stages~~ domains and dimensions of capability. 23 factors enabling successful lean in hospitals were identified in the systematic review, whereby management and a supportive culture, training, accurate data, physicians and team involvement were most frequent.

**Conclusions:** In the absence of evidence, the two-dimensional framework, incorporating the context, may prove useful for future research on variation in outcomes from lean interventions. Findings from the review suggest that characteristics and local application of lean, in addition to ~~the organizations~~ strategic and cultural capability, should be given further attention in health care quality improvement.

## ARTICLE SUMMARY

### Article focus

- There is conflicting evidence on the outcomes of lean thinking in health care.
- Reviewing the literature within the approach of a new contextual framework can deepen our understanding of lean as a quality improvement method.
- Identifying factors facilitating intended outcomes from lean interventions, contribute to new knowledge on when and how lean interventions works.

### Key messages

- 23 factors enabling successful lean in hospitals are identified, whereby management and a supportive culture, training, accurate data, physicians and team involvement **were** most frequent.
- Characteristics of lean and local application, in addition to the organizations strategic and cultural capability, should be given further attention in health care quality improvement.
- In the absence of evidence, a framework incorporating the context may prove useful for future research on lean interventions.

### Strengths and limitations of this study

- This review of reviews sums up the **major** findings regarding facilitators for lean interventions in health care the latest decade.
- The immaturity of the research **field** makes it hard to find **solid-substantial** evidence for effective lean interventions in health care.
- The fact that lean is social, complex and context-dependent interventions, call for a shift from cause-effect to conditional attributions in research.

## INTRODUCTION

Lean thinking has been introduced in health care during the latest decades as a quality improvement method[1]. Lean can be challenging to adopt in a medical environment, where professionals require evidence before taking action[2-4]. Researchers remark a profound gap and tension between the medical approach and lean thinking[5 6]. The call for scientific proof for lean as an efficient and effective quality improvement method is strong[7]. Lack of evidence may lead to resistance and hinder speed up and spread of quality initiatives in health care[1 8-10].

Lean interventions aim to improve quality by reducing waste, and facilitate flow in patient care work-processes[11]. Lean techniques include value stream mapping of start-to-end processes, identification and elimination of activities that do not add value, and streamlining of value-adding activities[12]. Focus on measurements and continuous improvement is expected to promote implementation and sustainability.

In a recent review, Mazzocato et al. (2010) concluded that lean has been applied successfully in health care institutions worldwide[13]. However, most studies have a narrow technical application with limited organizational reach. Many are single case studies, some quite anecdotal, while others are biased or characterized by a weak study design. Some reviews suggest that inappropriate analyses, a lack of alternative hypotheses, and other methodological limitations undermine validity[2 5 14]. This makes it difficult to rule out confounding explanatory factors, to measure outcomes and generalize results from lean interventions[6].

Advocates for experimental designs question results from qualitative studies, and argues that randomized controlled trials are necessary to isolate effects[15 16]. Manyest studies using an experimental design did not find any significant effect of lean and other quality improvement interventions[2-5-9-10-14][1 2 6 9 10 17]. Experimental methods are not very helpful in understanding interventions' effectiveness because they rule out context, content, and application variables[9]. We cannot be sure that the specific intervention – and not other factors – produced the observed change[2 10].

The key problem is the adaption of study designs that do not allow drawing solid conclusions, particularly as they fail to take into account contingency factors that are needed to translate

1  
2  
3  
4  
5  
6  
7 | [findings from one setting to another](#). Is there a cure for this lack of evidence? On a paramount  
8 level, one must ask whether absence of evidence justifies inaction[18]. The *quality chasm*  
9 between the health care we have and the health care we should have is well documented[19  
10 20]. In other words, the call for action is still there, and, these obstacles to quality  
11 improvement must be crossed. ~~[21]~~

### 14 **Lean as social, complex and context-dependent interventions**

15 Shortell et al. (2007) emphasized the need to link evidence-based medicine and what they  
16 refer to as evidence-based management, arguing that medicine must take into account the  
17 complex organizational and social context in which care is delivered[21]. Such integration of  
18 the intervention and its context seldom happens in quality improvement research[22].  
19 Lean interventions operate differently from the clinical interventions affecting biological  
20 systems, in which a linear cause-effect relationship controlling the influence of context is  
21 assumed. Context are simply defined as all surrounding factors that are not part of the  
22 intervention itself[23]. However, the boundaries between the intervention and its  
23 surroundings may be relatively arbitrary, as lean interventions are social, complex and  
24 inherently context-dependent[24 25]. Lean interventions consist of multiple, reciprocally  
25 interacting elements. They evolve over time in response to continuous feedback as situation  
26 dependent cumulative processes, and are therefore intrinsically unstable and difficult to  
27 standardize. Lean and other quality improvement methods are often adjusted, mixed,  
28 implemented and used simultaneously[26 27]. This fact challenges the strict distinction  
29 between lean and other quality improvement methods. Finally, lean interventions are open  
30 systems that feed back on themselves, so that with learning, they may change the conditions  
31 that made them work in the first place.

40  
41 | There is a growing literature on lean facilitators. [According to Grimshaw et al, systematic](#)  
42 [reviews provide the best evidence on the effectiveness of quality improvement](#)[28]. We  
43 observe a growing consensus that characteristics like management, resources and culture  
44 matter, but the current knowledge base lacks specification on when and how the different  
45 facilitators work. This vagueness partly rest on insufficient methodological attention to the  
46 context in which lean interventions work. To understand and assess variation in lean  
47 interventions success, there is a need for a conceptual framework defining facilitators for  
48 change at the stages and levels where they are activated. These facilitators, also named  
49 enablers, determinants for effectiveness and so on, may be defined as [contextual-contingency](#)

1  
2  
3  
4  
5  
6  
7  
8  
9  
10  
11  
12  
13  
14  
15  
16  
17  
18  
19  
20  
21  
22  
23  
24  
25  
26  
27  
28  
29  
30  
31  
32  
33  
34  
35  
36  
37  
38  
39  
40  
41  
42  
43  
44  
45  
46  
47  
48  
49  
50  
51  
52  
53  
54  
55  
56  
57  
58  
59  
60

factors which help the progress of lean interventions[8 22 29], and shift the focus from cause-effect to conditional attributions.

The University Hospital of North Norway underwent a complex merger and restructuring process between 2007 and 2010[30]. An enterprise-wide ~~comprehensive-lean~~ program for improvement ~~of clinical pathways using lean methods~~ was launched. The program aimed to accomplish ~~a~~ quality improvement ~~effort~~ in parallel with the organizational change to counteract the transitional setbacks in quality that large-scale change may entail[31]. A research program was established to evaluate the effects. ~~We identified a need for a theoretical and methodological framework to analyse variation in adoption of lean interventions at the hospital.~~ The proposed framework represents a theoretical tool to understand more of how and when lean interventions work at the hospital. Our approach incorporates the complex social and organizational context in which the interventions are applied and the different stages of adoption. We suggest that the emerging knowledge could guide decision makers considering lean interventions, assessing the organizations' readiness for change[22 32]. The specific aim of the study was to identify contingency factors influencing intended outcomes of lean interventions, and to understand when and in which dimension different factors contribute.

## METHODS

A systematic narrative review[33] of reviews of quality improvement in hospitals was conducted. One reviewer performed the systematic review, supervised by the two co-authors. ~~Discrepancies~~ Any confusion ~~were~~ was resolved by discussion involving all three authors. The initial inclusion criteria were English language articles published in a peer-reviewed journal in the period 2000-2012. Search words included hospital, health care, quality improvement, lean thinking, lean management, and review/evaluation. By searching Pubmed, Web of Science, Embase, Cochrane and Scopus, 251 articles were identified. A snowball approach was used to search for supplementary articles, adding 13 articles. 15 duplicate articles were removed. The titles and abstracts of these 249 articles were screened according to the *Prisma guidelines* for reporting reviews and meta analysis (supplementary file)[34]. 196 original articles were excluded. Exclusion criteria included absence of a hospital or organizational focus, single-unit case studies, and hybrid quality improvement approaches. As a result, 53 articles were assessed for eligibility. After a full-text review, another 35 articles were excluded by the

6

1  
2  
3  
4  
5  
6  
7 criteria that neither large-scale quality improvement, success criteria or lean thinking were  
8 issued. Articles that mainly represented practical guidelines were also ~~were~~-excluded. The  
9 final review included 18 articles[10 13 17 22 23 26 27 31 35-44].  
10

### 11 **Data analysis**

12 The 18 articles were systematized according to the number of studies included in each review.  
13 Eight articles reviewed a number of definite cases, varying from four to 90 (median 33). The  
14 remaining articles were expert evaluations, narrative or unsystematic reviews, all covering  
15 lean interventions in hospitals-- Half of the articles review only lean interventions, while the  
16 others include lean and corresponding methods like *Productive ward* and process oriented  
17 redesign. Lean was extracted and treated separately as far as possible, though confined by the  
18 observed mix, similarity and simultaneously use of different quality improvement methods in  
19 hospitals[5 22 26 27]. The mMethods used in the original studies were qualitative,  
20 quantitative, or a mixed-method approach. Most studies were based on cases originated in the  
21 United States, Australia and Great Britain.  
22  
23  
24  
25  
26  
27  
28

29  
30 The next step was to search for facilitators, defined as contextual-contingency factors  
31 predicted to promote quality improvement, as opposed to barriers that hinder  
32 improvement[37]. The decision to concentrate on facilitators and not barriers to lean  
33 improvement were based on the fact that the research literature at this field chiefly pays  
34 attention to facilitators and not barriers[5 8 10 13 17 22 23 38]. In most cases, the facilitators  
35 were quite easy to identify in the texts despite different annotations used, including *enablers*,  
36 *conditions*, *factors* and *key facilitators*, *critical elements*, *determinants of effectiveness*, and  
37 *contextual characteristics*. Using the method of feature maps, which enable localization of  
38 similarities and differences among studies[33], the articles were systematically analyzed and  
39 recorded in a standardized format, according to the facilitators. The procedure were conducted  
40 by creating a worksheet categorizing every paper according to author, year of publishing, kind  
41 of review, supplementary-other quality improvement methods comprised (in addition to lean),  
42 research method, labelling of facilitators, and facilitating factors. The complete worksheet is  
43 attached as a supplementary file.  
44  
45  
46  
47  
48  
49  
50

51 All the identified facilitators were assigned to larger categories. This classification was done  
52 to develop a more specific and practically focused state of knowledge concerning facilitators  
53 for lean thinking, as the need for an overview necessitated reducing the information to  
54  
55  
56  
57  
58  
59  
60

1  
2  
3  
4  
5  
6  
7 manageable amounts. All the identified facilitators concerning management and leadership  
8 were placed in the category *management*, covering subjects like management support,  
9 commitment and ownership. Cultural issues were all categorized as *supportive culture*,  
10 including views, norms ~~and~~ beliefs and behaviours supporting ~~lean~~ the principles and practice  
11 of quality improvement. All facilitators concerning local translation were put in the category  
12 *adaption*, as all facilitators dealing with prior involvement in quality improvement work were  
13 grouped under the heading *experience*, and so on. After examining all the 149 facilitators,  
14 grouping them with similar ones, we ended up with a list comprising 23 facilitators. The  
15 different facets of these facilitators are all listed in box 1 below. Finally, the frequency of each  
16 of the facilitators in the 18 reviews was accounted for.  
17  
18  
19  
20

### 21 22 **A theoretical and methodological framework**

23 Lean interventions consist of several different phases, from planning and preparation to  
24 implementation and sustainability, involving different organizational capabilities. The  
25 facilitators for improvement were analyzed and reorganized in a table combining Shortell's  
26 *dimensions of capability*[2 45], and Walshe's *domains of an intervention*[9]. Shortell  
27 categorized improvement factors according to cultural, technical, strategic, and structural  
28 dimensions of an intervention. The *cultural* dimension refers to the underlying beliefs, values,  
29 norms and behaviours of the organization. The *technical* dimension covers training and  
30 information system issues, while the *strategic* dimension emphasizes the conditions that offer  
31 the greatest opportunities to change. This dimension touch upon the degree of integration of  
32 quality improvement in the hospital's strategic plans, and to which extent improvement efforts  
33 are devoted to processes central to strategic priorities. The *structural* dimension relate to  
34 mechanisms that facilitate learning and disseminate best practices throughout the  
35 organization. The four dimensions are multiplicative, interrelated, and equally necessary for  
36 lasting quality improvement according to Shortell. Varying lean success can be understood as  
37 a result of the interplay of dynamic processes related to the four dimensions[45].  
38  
39  
40  
41  
42  
43  
44  
45

46  
47 Walshe's differentiated domains ~~or phases~~ in quality interventions are labelled as context,  
48 content, application and outcomes. The context involves ~~the preparation phase before starting~~  
49 ~~improvement work, highlighting aspects of~~ the situation, setting or organization in which the  
50 intervention is deployed. Context may vary widely, both within and between hospitals. This is  
51 a narrow view of context, and should not be confused with the broader understanding of  
52 context as all surrounding factors that are not part of the technical intervention itself[8]. In  
53  
54  
55

Field Code Changed

56  
57  
58  
59  
60  
8



1  
2  
3  
4  
5  
6  
7 ~~this article, we therefore renamed this phase as the organizational setting.~~ The *content*  
8 describes the ~~phase where lean is introduced as a tool,~~ the nature or characteristics of the  
9 intervention itself. The content of lean may be standardized and repeatable or modified and  
10 easy to redesign. The *application* covers the process through which the intervention is  
11 delivered. This process may be protocol-driven or widely varying depending on local actors.  
12 *Outcomes* are the results of the intervention, including the maintenance phase after  
13 implementation. All of these ~~phases-domains~~ may be characterized by low or high variance.  
14 High levels of variance in the settings, content and application may explain interventions  
15 varying success. Variances also reduce the ability to generalize empirically, and to draw  
16 conclusions about effects from one specific context to another. The complex relationship  
17 between context, content, application and outcomes must be unpicked to develop a situational  
18 understanding of effectiveness[9].  
19  
20  
21  
22  
23  
24

25 By combining Shortell's dimensions and Walshe's domains, this two-dimensional framework  
26 made it possible to classify identified facilitators for quality improvement, both as emerging  
27 in different ~~phases-domains~~ in a multistage process and by different organizational  
28 dimensions. The framework was used to describe and understand the ~~organizational and~~  
29 contextual factors encountered in an organizational-wide quality improvement effort.  
30  
31  
32  
33

## 34 RESULTS

35 Among the 18 reviewed articles, 149 facilitators for lean interventions were found. The  
36 reviews identified ~~three-3~~ to 16 (median seven) facilitators for improvement. All were  
37 identified in several reviews, varying from ~~three-3~~ to 14 (median seven) times. The facilitators  
38 were categorized into 23 extensive classes, covering the range of all the identified facilitators.  
39  
40  
41  
42  
43  
44  
45  
46  
47  
48  
49  
50  
51  
52  
53  
54  
55  
56  
57  
58  
59  
60

1  
2  
3  
4  
5  
6  
7  
8  
9  
10  
11  
12  
13  
14  
15  
16  
17  
18  
19  
20  
21  
22  
23  
24  
25  
26  
27  
28  
29  
30  
31  
32  
33  
34  
35  
36  
37  
38  
39  
40  
41  
42  
43  
44  
45  
46  
47  
48  
49  
50  
51  
52  
53  
54  
55  
56  
57  
58  
59  
60*Box 1: Facilitators for change: description*

**Adaption:** Local translation of the Lean intervention

**Measurement:** Audits local performance metrics on regular basis as evidence

**Holistic approach:** Lean as an entire value system, embracing every day improvement

**Belief:** In staff and patient benefits encourage willingness and motivation

**Experience:** Prior quality improvement using a successful, mature method

**Administrative support:** Practical facilitation by a project management

**Competence:** In tools, assumptions and methods assure capability

**Communication:** With and between patients and staff, including feedback to both

**Alignment:** Consistency to strategic objectives and priorities of strategic importance

**IT-systems:** Adequate IT support and infrastructure established

**Continuous improvement:** A long-term plan, securing endured and sustained attention

**System-wide scope:** Multifaceted interventions, across silos and functional divides

**Vision:** Targets of urgency and direction, but realistic, simple and practical solutions

**Customer focus:** Include patient and workforce value creation and improvements

**External support:** Expert change agents, networks and sponsorship triggers change

**Staff involvement:** Commitment, engagement, and empowerment by staff participation

**Resources:** Available, sufficient and accessible capacities

**Accurate data:** Robust and timely, evidence-based data as a impetus to change

**Physicians:** Clinical leadership and champions' engagement, support and collaboration

**Teamwork:** Multi-skilled and –disciplinary team collaboration including decision-making

**Training:** Accessible, substantial, practical and relevant training for immediate use

**Supportive culture:** Views, norms and beliefs that support ~~lean-represent-readinessquality~~  
improvement

**Management:** Leadership support, ownership and commitment

Figure 1 show how frequent the different facilitators were identified in the 18 reviews.

Figure 1: Frequency of different facilitators identified in 18 reviewed articles

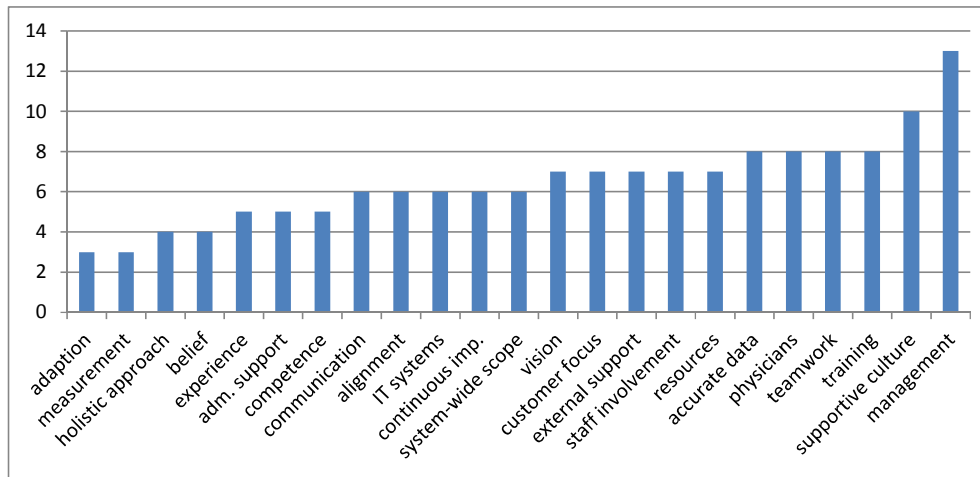

**DISCUSSION**

Table 1 show how the different facilitators were found relevant in the different intervention phases-domains and affected organizational dimensions.

Table 1: Facilitators for change, literature reviews 2000–2012

| Dimensions of capability                                                              | Part-Domain of the intervention              |                                                |                                       |                                             |
|---------------------------------------------------------------------------------------|----------------------------------------------|------------------------------------------------|---------------------------------------|---------------------------------------------|
|                                                                                       | SettingContext<br>Situation and organization | Content<br>Characteristics of the intervention | Application<br>Local delivery process | Outcomes<br>Results and maintenance         |
| <b>Cultural</b><br>Underlying beliefs, values, norms and behavior                     | Experience<br>Belief                         | Adaption<br>Customer focus                     | Teamwork                              | Supportive culture                          |
| <b>Technical</b><br>Training and info support systems                                 | IT systems<br>Competence                     | Training                                       | Administrative support                | Communication                               |
| <b>Strategic</b><br>Strategic importance and opportunity to change                    | Alignment<br>Vision                          | Resources                                      | Physicians<br>Management              | Holistic approach<br>Continuous improvement |
| <b>Structural</b><br>Mechanisms to facilitate learning and disseminate best practices | External support                             | Accurate data                                  | Staff involvement                     | Measurement<br>System-wide scope            |

**SettingContext:** Situation and organization.

1  
2  
3  
4  
5  
6  
7  
8  
9  
10  
11  
12  
13  
14  
15  
16  
17  
18  
19  
20  
21  
22  
23  
24  
25  
26  
27  
28  
29  
30  
31  
32  
33  
34  
35  
36  
37  
38  
39  
40  
41  
42  
43  
44  
45  
46  
47  
48  
49  
50  
51  
52  
53  
54  
55  
56  
57  
58  
59  
60

~~Initially, a well proven, successful quality improvement method characterized by program maturity facilitates. Prior experience, accompanied by success stories demonstrating benefits for patients and staff, are enabling enablers~~ improvement[23 31 37]. ~~Lean should be accompanied by success stories demonstrating benefits for patients and staff.~~ This relates to the organization's cultural capability and the influence of the underlying beliefs, values, norms, and behaviours. Motivation influences the willingness to participate[13 17 37 38 40 41 44]. IT-systems infrastructure and competence[17 23 31 36-38], as well as external experts sponsoring, strengthen the technical and structural capability. Sponsorship triggers learning and ~~may~~ contribute to dissemination of best practices throughout the organization[17 31 35 38-40 44]. Competence in tools and methods support the assumptions of lean, and increase the potential for change[26 27 36 38]. Ambitious targets aligned with the hospital's overall goals and strategies strengthen the strategic capability[17 31 36 38 41 44]. The goals have to be of strategic importance, but at the same time realistic, based on simple and practical solutions[17 22 31 36 40 44].

#### **Content: Characteristics of the intervention**

Adaption and translation to local conditions are a precondition for success[26 35 37]. A methodology communicating a clear patient and workforce focus supports the cultural dimension. Emphasis on patient processes, value creation, and patient needs facilitate quality improvement in health care[10 13 23 35 37 42 44]. Access to, and accomplished substantial training in methods and tools strengthens the organizations technical capability[10 17 22 26 31 35 36 38 44], as sufficient and available resources, financial as well as staff time, affect the strategic dimension[10 17 22 23 31 35 36 38 44]. On the structural dimension, accurate and robust data represent an impetus to learning and spread of best practices. Timely data contribute to an evidence-based quality improvement initiative, ~~which facilitates lean interventions~~[13 17 36 37 39 40 44]. Availability and sufficiency of training, data and other resources are among the most frequent facilitators in the reviewed articles, and thereby probably among the most important drivers for change.

#### **Application: Local delivery process**

Collaborating multidisciplinary and multi-skilled teams strongly facilitate local application of lean[23 31 35-38 42 43]. Strengthening the improvement culture presupposes workforce stability, team leadership, and decentralized decision making. Administrative project management and practical support secures backing, and contributes to the technical capability

12

of the organization[22 31 36 44]. Strategically, involvement of physicians and management encourage change. Management engagement include both frontline and senior managers, maintaining urgency, setting direction, reinforcing expectations and providing resources[10 13 17 22 23 31 35 36 38-42 44]. Physicians represent champions and clinical leadership, and their involvement, engagement, and collaboration are crucial-important at the strategic level as role models and peers for others[10 17 23 31 36 38 40 43]. Both management and physicians involvement are among the most frequent identified enablers of quality improvement in the literature jointly with teamwork. Key factors to disseminate best practices are staff participation, engagement, and empowerment. Staff commitment, responsibility and ownership, are required for achieving lasting outcomes of lean interventions[26 35 38-42 44].

### Outcomes: Results and maintenance

To secure maintenance, a hospital depends first and foremost strongly on a supportive culture characterized by norms, and beliefs and behaviours supporting the principles and practice of quality improvement and readiness[10 22 23 35-38]. In a supportive culture, employees feel that they can make use of their skills and creativity, take initiative, and cause things to happen [35]. At the technical dimension, communication and feedback between patients and staff are facilitating enablers [31 35 38 43 44]. Strategically, a holistic approach based on continuous improvement and sustained attention affect the ability to accomplish change. A holistic approach emphasizes that lean is a total strategy not only to promote everyday improvement but also a philosophy of ongoing quality improvement within the hospital's value system[13 17 27 35 41]. A long-term plan should be established to secure continuous improvement[10 13 17 26 27 37]. Local audits and measurements conducted on a regular basis relate to the organization's structural capability, which strengthen the evidence for lean interventions[36 37 39 40]. A system-wide multifaceted approach, across functional divides, allows best practices to be learned and disseminated.

~~In addition to a supportive culture, the most frequent facilitators are identified in the content and local application parts of the intervention. That is, the most reported success factors for lean, touch upon characteristics of the intervention and its local delivery process. Most of the frequent facilitators concern the strategic or the cultural dimension of capability, interventions strategic importance to the hospitals overall goals and the organizations underlying beliefs, values, norms and behavior.~~

## DISCUSSION

Analysis based on the conceptual framework suggest that understanding which facilitators influence the intervention at different ~~stages-domains~~ and dimensions of capability, ~~is~~ probably ~~is~~-more important than a quantitative approach[8 17]. ~~The emphasis on the interventions different parts and the organizational dimensions~~This represent a shift from cause-effect to conditional attributions[45]. Each ~~part-domain~~ and dimension is influenced by the status of other ~~dimensionsones~~. Our results summarized in table 1 ~~show-indicate~~ that a number of facilitators ~~representing the four dimensions~~ may interact ~~during the~~within and between the four stages-domains and dimensions of change. The four dimensions, ~~domains~~ and the associated facilitators are interrelated and ~~equally-probably all~~ necessary to achieve lasting results[2]. ~~In the following~~Finally, we elaborate our interpretation of these findings.

~~Rycroft-Malone et al (2002) concludes that there are three key elements of implementation: evidence, facilitation and context~~[4]. Our analyses of data from previous review articles within this new framework show that successful lean interventions share some common features. We identified 23 facilitators associated with successful interventions.

~~However~~Unfortunately, ~~it is evident that~~ little is known about which facilitators that are most important[8 22]. Management and leadership engagement was identified as important by 13 of the 18 reviewed reviews. The other facilitators most frequently identified were a supportive culture, accurate data and training, along with physician and team involvement. This is in accordance with the conclusions from ~~recent-relevant~~ research ~~in the field~~, and may indicate that these facilitators are vital to accomplish quality improvement[13 23 31 35]. Two recent reviews conclude that leadership, culture, maturity, and data infrastructure have a stronger evidence base than other ~~factors~~[23 38]. Our results nevertheless suggest that successful interventions must utilise multiple facilitators from the four dimensions of capability, interplaying as the change processes ~~go through its four~~touch upon the different stagesdomains. The observation that the facilitators identified in this study were in accordance with those promoted in other, broader theories of implementation concerning uptake of evidence and innovations in health care[4 23 46] strengthen the findings.

The most frequent facilitators belong to the *content* or *application* part of the intervention. This may indicate that policymakers should pay special attention to the content of lean and the local delivery process. Sufficient resources, accurate data and training are crucial for lean

1  
2  
3  
4  
5  
6  
7 interventions to succeed. Lean are not a ~~reecipt~~recipe that can be implemented locally if the  
8 training or available resources are inadequate. The need for local resource allocation should  
9 not be underestimated. This is in accordance to Radnor et al (2012), that advocate that lean  
10 interventions must be contextualized, rather than transplanted like a recipe[27].  
11

12  
13  
14 This assertion is supported by the frequently identified facilitators labelled physicians and  
15 management. Leadership and clinical leadership are keys to understand why, or why not, lean  
16 interventions make contributions to health care[47]. Finally, the local application of lean in  
17 hospitals depends heavily on teamwork by multi-skilled and multidisciplinary teams. Work-  
18 floor staff must be engaged and empowered. Womack and Jones (2003) that initially  
19 advocated lean thinking in healthcare, emphasized the multi-skilled teams as a main  
20 advantage for hospitals, making lean suitable for health care[12].  
21  
22  
23

24  
25 The cultural and strategic dimensions of capability embrace most of the frequent facilitators.  
26 A supportive culture are fundamental to achieve quality improvements[38]. The  
27 organizational culture and the strategic importance of the patient path exposed to the  
28 improvement initiative are essential to understand variation in outcomes of lean interventions.  
29 Available resources, physicians and managements involvement, indicate and affect the  
30 strategic importance and thereby the opportunity to change. ~~This finding~~These findings are  
31 supported by other recent hospital-based studies, like Rozenblum et al (2013)[47].  
32  
33  
34  
35  
36

37 ~~The main contribution of this review is a two-dimensional framework for identification and~~  
38 ~~analysis of facilitators for lean interventions in health care. This framework incorporates the~~  
39 ~~complex social and organizational context in which lean are applied. These findings coincide~~  
40 ~~with recent research calling for more attention to the influence of organizational context when~~  
41 ~~trying to understand variance in interventions in healthcare[23]. We suggest that it will prove~~  
42 ~~useful in future research aiming for a better understanding of how the likelihood to~~  
43 ~~accomplish success in lean interventions can be increased[14]. The framework will also be~~  
44 ~~used in future research locally at the hospital, as a practical tool to assess variation in adoption~~  
45 ~~of lean.~~  
46  
47  
48  
49

### 50 51 **Limitations**

52 Making these interpretations from a systematic review of reviews must take the methods'  
53 limitations into consideration. The facilitators were grouped with similar ones, and sometimes  
54  
55

1  
2  
3  
4  
5  
6  
7  
8  
9  
10  
11  
12  
13  
14  
15  
16  
17  
18  
19  
20  
21  
22  
23  
24  
25  
26  
27  
28  
29  
30  
31  
32  
33  
34  
35  
36  
37  
38  
39  
40  
41  
42  
43  
44  
45  
46  
47  
48  
49  
50  
51  
52  
53  
54  
55  
56  
57  
58  
59  
60

renamed, risking that the original meaning could be misread and mistranslated by our interpretation. Transparency are promoted by eConducting feature maps and presenting all the identified facilitators in appendices ~~promote transparency.~~

~~Further on, i~~t could be argued that facilitators identified in large reviews should be given more weight than those identified in smaller ones. However, our analysis identified the same facilitators across small and large reviews. Therefore, weighting was not conducted, even though we suggest that facilitators identified in many studies are significant.

~~And finally, i~~ncluding both qualitative and quantitative studies eliminates the possibility of quantifying the findings and predicting effects of the various facilitators by meta-analysis. The inclusion of both types of studies broadens the scope, increase the ability to identify an ampler spectre of facilitators, and contribute to understanding the role of context in lean interventions.

### Directions for future research

A critical review concluded that most of the research on hospital quality is dominated by questions of *what* and does not go further to investigate the *how*, *when*, and *why*[48]. They called for approaches that incorporate structure, process, and outcomes. The fact that we know so little about the relationship between these, makes it difficult to recommend ways of organizing that could improve patient care[49].

The facilitators identified and the two-dimensional framework proposed in the present work incorporates structure and process. Still, the facilitators are characterized by vagueness, as broad and comprehensive determinants, that needs further specification and practical content to guide future effective quality improvements to health care organizations[8 22 38 50]. In addition to contextual preconditions, success are dependent on how the organization utilize, combine and sequence organizational resources and routines[32]. A logical next step will be to measure and analyse outcomes in the context of this framework, with the identified facilitators as explanatory variables. Possible measures of outcomes could be related to the health care providers performance (adherence to recommended practice), patient outcome (as quality of life or mortality), surrogate outcomes (as readmission) and organizational outcomes (like resource use or sustainability)[36]. At the University Hospital of North Norway, more than five years of lean experience and more than 20 implemented lean interventions leave us with a sufficient amount of empirically based cases to assess due to varying success.



## CONCLUSION

The article can findings contribute to reduce the gap between theory and practice, by a shift in focus from cause-effect to conditional attributes or characteristics of an effective organization-wide quality intervention. The review of reviews identified 23 interrelated facilitators for lean in hospitals, where management engagement, cultural support, accurate data and training, along with teamwork, physician and staff involvement were most frequent. The findings suggest that characteristics of lean and the local application should be given attention, in addition to the organizations' cultural and strategic capability. The main contribution of this review is a two-dimensional framework for identification and analysis of facilitators for lean interventions in health care. This framework incorporates the complex social and organizational context in which lean are applied. These findings coincide with recent research calling for more attention to the influence of organizational context when trying to understand variance in interventions in healthcare[23]. We suggest that it will prove useful in future research aiming for a better understanding of how the likelihood to accomplish success in lean interventions can be increased[14]. The framework will also be used in future research locally at the hospital, as a practical tool to assess variation in adoption of lean.

~~We provide a framework, which emphasizes the importance of context by relating facilitators to four dimensions of organizational capability and four stages of change, and suggest that this represent a practical tool for understanding and assessing variation in lean adoption. The article can contribute to reduce the gap between theory and practice, by a shift in focus from cause-effect to conditional attributes or characteristics of an effective organization wide quality intervention. The review of reviews identified 23 interrelated facilitators for lean in hospitals, where management engagement, cultural support, accurate data and training, along with teamwork, physician and staff involvement were most frequent. The findings suggest that characteristics of lean and the local application should be given attention, in addition to the organizations cultural and strategic capability.~~

Acknowledgements: The authors would like to thank David Greenfield (PhD) and John Øvretveit (PhD) for their assistance in clarifying concepts in the discussion. We would also like to thank James Morrison for his language assistance.

Contributors: All the listed authors met the authorship requirements as defined by the ICJME. HA contributed to the conception and design, the acquisition, analysis and interpretation of the data, as well as drafting and revising the article. TI and KAR made a substantial

1  
2  
3  
4  
5  
6  
7  
8  
9  
10  
11  
12  
13  
14  
15  
16  
17  
18  
19  
20  
21  
22  
23  
24  
25  
26  
27  
28  
29  
30  
31  
32  
33  
34  
35  
36  
37  
38  
39  
40  
41  
42  
43  
44  
45  
46  
47  
48  
49  
50  
51  
52  
53  
54  
55  
56  
57  
58  
59  
60

contribution to the design and interpretation of the data, as well as to drafting and critical revising of the article. All the authors have provided final approval of the submitted manuscript.

Funding: The PhD-study is founded by the regional health trust of North Norway, Helse Nord RHF

Competing interest: None

For peer review only

1. Joosten T, Bongers I, Janssen R. Application of lean thinking to health care: issues and observations. *International Journal for Quality in Health Care* 2009;**21**(5):341-47
2. Shortell SM. *Assessing the Implementation and Impact of Clinical Quality Improvement Efforts: Abstract, Executive Summary and Final Report*: Agency for Health Care Policy and Research, 1998.
3. Shojania KG, Grimshaw JM. Evidence-based quality improvement: the state of the science. *Health Affairs* 2005;**24**(1):138-50
4. Rycroft-Malone J, Kitson A, Harvey G, et al. Ingredients for change: revisiting a conceptual framework. *Quality & Safety in Health Care* 2002;**11**:174 - 80
5. Young T, McClean S. A critical look at Lean Thinking in healthcare. *Quality and Safety in Health Care* 2008;**17**(5):382-86
6. Alexander JA, Hearld LR. What Can We Learn From Quality Improvement Research? A Critical Review of Research Methods. *Medical Care Research and Review* 2009 doi: 10.1177/1077558708330424[published Online First: Epub Date].
7. de Souza LB. Trends and approaches in lean healthcare. *Leadership in Health Services* 2009;**22**(2):121-39
8. Øvretveit J. Understanding the conditions for improvement: research to discover which context influences affect improvement success. *BMJ quality & safety* 2011;**20**(Suppl 1):i18-i23
9. Walshe K. Understanding what works—and why—in quality improvement: the need for theory-driven evaluation. *International Journal for Quality in Health Care* 2007;**19**(2):57-59
10. Øvretveit J, Gustafson D. Evaluation of quality improvement programmes. *Quality and Safety in Health Care* 2002;**11**(3):270-75
11. Liker JK, Kaisha TJKK. *The Toyota way: 14 management principles from the world's greatest manufacturer*: McGraw-Hill New York, 2004.
12. Womack JP, Jones DT. *Lean thinking: banish waste and create wealth in your corporation, revised and updated*: Free Press, 2003.
13. Mazzocato P, Savage C, Brommels M, et al. Lean thinking in healthcare: a realist review of the literature. *Quality and Safety in Health Care* 2010;**19**(5):376-82
14. Vest JR, Gamm LD. A critical review of the research literature on Six Sigma, Lean and studergroup's hardwiring excellence in the United States: the need to demonstrate and communicate the effectiveness of transformation strategies in healthcare. *Implement Sci* 2009;**4**(35):1-9
15. Craig P, Dieppe P, Macintyre S, et al. Developing and evaluating complex interventions: the new Medical Research Council guidance. *BMJ* 2008;**337**(sep29\_1):a1655-a55
16. Perneger T. Ten reasons to conduct a randomized study in quality improvement. *International Journal for Quality in Health Care* 2006;**18**(6):395-96
17. Powell A, Rushmer R, Davies H. A systematic narrative review of quality improvement models in health care. *Social Dimensions of Health Institute at The Universities of Dundee and St Andrews* 2008
18. Altman DG, Bland JM. Statistics notes: Absence of evidence is not evidence of absence. *BMJ* 1995;**311**(7003):485 doi: 10.1136/bmj.311.7003.485[published Online First: Epub Date].
19. Corrigan JM. *Crossing the quality chasm*: Washington, DC, National Academy Press, 2001.
20. Kohn LT, Corrigan J, Donaldson MS. *To err is human: building a safer health system*: Joseph Henry Press, 2000.
21. Shortell SM, Rundall TG, Hsu J. Improving patient care by linking evidence-based medicine and evidence-based management. *JAMA: the journal of the American Medical Association* 2007;**298**(6):673-76
22. Walshe K, Freeman T. Effectiveness of quality improvement: learning from evaluations. *Quality and Safety in Health Care* 2002;**11**(1):85-87
23. KAPLAN HC, BRADY PW, DRITZ MC, et al. The influence of context on quality improvement success in health care: a systematic review of the literature. *Milbank Quarterly* 2010;**88**(4):500-59
24. Davidoff F. Systems of service: reflections on the moral foundations of improvement. *BMJ quality & safety* 2011;**20**(Suppl 1):i5-i10
25. Pawson R, Greenhalgh T, Harvey G, et al. Realist review—a new method of systematic review designed for complex policy interventions. *Journal of health services research & policy* 2005;**10**(suppl 1):21-34
26. Walshe K. Pseudoinnovation: the development and spread of healthcare quality improvement methodologies. *International Journal for Quality in Health Care* 2009;**21**(3):153-59
27. Radnor ZJ, Holweg M, Waring J. Lean in healthcare: The unfilled promise? *Social Science & Medicine* 2012;**74**(3):364-71
28. Grimshaw J, McAuley L, Bero L, et al. Systematic reviews of the effectiveness of quality improvement strategies and programmes. *Quality and safety in health care* 2003;**12**(4):298-303

- 1
  - 2
  - 3
  - 4
  - 5
  - 6
  - 7
  - 8
  - 9
  - 10
  - 11
  - 12
  - 13
  - 14
  - 15
  - 16
  - 17
  - 18
  - 19
  - 20
  - 21
  - 22
  - 23
  - 24
  - 25
  - 26
  - 27
  - 28
  - 29
  - 30
  - 31
  - 32
  - 33
  - 34
  - 35
  - 36
  - 37
  - 38
  - 39
  - 40
  - 41
  - 42
  - 43
  - 44
  - 45
  - 46
  - 47
  - 48
  - 49
  - 50
  - 51
  - 52
  - 53
  - 54
  - 55
  - 56
  - 57
  - 58
  - 59
  - 60
29. Shortell SM, Bennett CL, Byck GR. Assessing the impact of continuous quality improvement on clinical practice: what it will take to accelerate progress. *Milbank Quarterly* 2001;**76**(4):593-624
30. Ingebrigtsen T, Lind M, Krogh T, et al. Merging of three hospitals into one university hospital. *Tidsskrift for den Norske lægeforening: tidsskrift for praktisk medicin, ny række* 2012;**132**(7):813
31. Vos L, Chalmers SE, Dücker MLA, et al. Towards an organisation-wide process-oriented organisation of care: A literature review. *Implementation Science* 2011;**6**(1):8
32. Weiner BJ. A theory of organizational readiness for change. *Implement Sci* 2009;**4**(1):67
33. Hart C. *Doing a literature review*. London: Sage Publications, 1998.
34. Moher D, Liberati A, Tetzlaff J, et al. Preferred reporting items for systematic reviews and meta-analyses: the PRISMA statement. *PLoS medicine* 2009;**6**(7):e1000097
35. Poksinska B. The current state of Lean implementation in health care: literature review. *Quality Management in Healthcare* 2010;**19**(4):319
36. Brennan S, McKenzie J, Whitty P, et al. Continuous quality improvement: effects on professional practice and healthcare outcomes. *The Cochrane Library* 2009
37. de Souza LB, Pidd M. Exploring the barriers to lean health care implementation. *Public Money & Management* 2011;**31**(1):59-66
38. Kaplan HC, Provost LP, Froehle CM, et al. The Model for Understanding Success in Quality (MUSIQ): building a theory of context in healthcare quality improvement. *BMJ quality & safety* 2012;**21**(1):13-20
39. Kim CS, MBA DAS, Billi JE. Creating value in health care: the case for lean thinking. *JCOM* 2009;**16**(12)
40. Kim CS, Spahlinger DA, Kin JM, et al. Implementation of Lean Thinking: one health system's journey. *Joint Commission Journal on Quality and Patient Safety* 2009;**35**(8):406-13
41. Lukas CVD, Holmes SK, Cohen AB, et al. Transformational change in health care systems: an organizational model. *Health care management review* 2007;**32**(4):309-20
42. Kollberg B, Dahlgaard JJ, Brehmer PO. Measuring lean initiatives in health care services: Issues and findings. *International Journal of Productivity and Performance Management* 2007;**56**(1):7-24
43. Winch S, Henderson AJ. Making cars and making health care: a critical review. *Medical Journal of Australia* 2009;**191**(7):415
44. Morrow E, Robert G, Maben J, et al. Emerald Article: Implementing large-scale quality improvement: Lessons þyfromTheProductiveWard: ReleasingTimetoCare! *Quality Assurance* 2012;**25**(4):237-53
45. O'Brien JL, Shortell SM, Hughes EF, et al. An integrative model for organization-wide quality improvement: lessons from the field. *Quality Management in Healthcare* 1995;**3**(4):19-30
46. Greenhalgh T, Robert G, Macfarlane F, et al. Diffusion of innovations in service organizations: systematic review and recommendations. *Milbank Quarterly* 2004;**82**(4):581-629
47. Rozenblum R, Lisby M, Hockey PM, et al. The patient satisfaction chasm: the gap between hospital management and frontline clinicians. *BMJ quality & safety* 2013;**22**(3):242-50
48. Hearld LR, Alexander JA, Fraser I, et al. Review: how do hospital organizational structure and processes affect quality of care? A critical review of research methods. *Medical Care Research and Review* 2008;**65**(3):259-99
49. West E. Management matters: the link between hospital organisation and quality of patient care. *Quality in Health Care* 2001;**10**(1):40-48
50. Bate P, Mendel P, Robert GB. *Organizing for quality: the improvement journeys of leading hospitals in Europe and the United States*: Radcliffe Publishing, 2008.

Appendix 1. Flow chart, detailed search strategy (Web only)



1  
2  
3  
4  
5  
6  
7  
8  
9  
10  
11  
12  
13  
14  
15  
16  
17  
18  
19  
20  
21  
22  
23  
24  
25  
26  
27  
28  
29  
30  
31  
32  
33  
34  
35  
36  
37  
38  
39  
40  
41  
42  
43  
44  
45  
46  
47  
48  
49  
50  
51  
52  
53  
54  
55  
56  
57  
58  
59  
60

1  
2  
3  
4  
5  
6  
7  
8  
9  
10  
11  
12  
13  
14  
15  
16  
17  
18  
19  
20  
21  
22  
23  
24  
25  
26  
27  
28  
29  
30  
31  
32  
33  
34  
35  
36  
37  
38  
39  
40  
41  
42  
43  
44  
45  
46  
47  
48  
49

Appendix 2. Articles comprised by the review (web only)

| Author/<br>year                             | Review/<br>size       | QI/<br>research method                                                              | Labels                                                                | Factors                                                                                                                                                                                                                                                                                                                                                                                                                                                                                                                                                                                                                                                                                       |
|---------------------------------------------|-----------------------|-------------------------------------------------------------------------------------|-----------------------------------------------------------------------|-----------------------------------------------------------------------------------------------------------------------------------------------------------------------------------------------------------------------------------------------------------------------------------------------------------------------------------------------------------------------------------------------------------------------------------------------------------------------------------------------------------------------------------------------------------------------------------------------------------------------------------------------------------------------------------------------|
| Poksinska B. 2010                           | Review<br>30 articles | Lean.<br>Theoretical/ case studies.                                                 | Enablers                                                              | <ul style="list-style-type: none"> <li>Commitment/participation from staff that owns and drives it</li> <li>Training and responsibility to staff (empowerment)</li> <li>Consultants/trainers from health care</li> <li>Management support, ownership and resources</li> <li>Organization culture</li> <li>An holistic approach - lean is not a toolbox</li> <li>Improve the entire system, involve several units</li> <li>Adaption, not adoption</li> <li>Clear view of the customer</li> <li>Teamwork, collaboration and communication</li> </ul>                                                                                                                                            |
| Powell A, Rushmer R, Davies H. 2008.        | Review<br>59 articles | QI, including Lean.<br>Observation, interviews, action research.                    | Necessary but not sufficient conditions for successful implementation | <ul style="list-style-type: none"> <li>Alignment with strategic objectives</li> <li>Quality as part of everyday life/every ones work</li> <li>Long time approach</li> <li>Active health professionals/doctors engagement</li> <li>Belief that staff/patient will benefit</li> <li>Strong leadership and clear vision</li> <li>Sustained active participation from board and senior management</li> <li>Multifaceted interventions sustained action at different levels</li> <li>Substantial investment in training and development (including IT and training of staff)</li> <li>Support from "change agents" to provide skills</li> <li>Robust and timely data</li> <li>Resources</li> </ul> |
| Vos L, Chalmers SE, Dückers MLA et al. 2011 | Review<br>10 articles | Process oriented redesign including Lean.<br>Uncontrolled before-after evaluations. | Factors for success                                                   | <ul style="list-style-type: none"> <li>Senior management support</li> <li>Clinical leadership and involvement</li> <li>Team-based problem solving</li> <li>Adequate information and communication technology support</li> <li>Administrative support</li> <li>Ambitious targets</li> <li>External facilitators</li> <li>Organizational readiness</li> <li>Selection and execution of projects in order of urgency</li> <li>Using a change strategy that already proved to be successful</li> <li>Good communication and training in QI techniques</li> </ul>                                                                                                                                  |

|                                                |                                              |                                                          |                                                                          |                                                                                                                                                                                                                                                                                                                                                                                                                                                                                                                                                                                                                                                                                  |
|------------------------------------------------|----------------------------------------------|----------------------------------------------------------|--------------------------------------------------------------------------|----------------------------------------------------------------------------------------------------------------------------------------------------------------------------------------------------------------------------------------------------------------------------------------------------------------------------------------------------------------------------------------------------------------------------------------------------------------------------------------------------------------------------------------------------------------------------------------------------------------------------------------------------------------------------------|
| Brennan S, McKenzie J, Whitty P, et al 2009    | Review - protocol                            | QI, including Lean. Qualitative and quantitative.        | Dimensions of capability thought necessary for successful implementation | Views, norms, beliefs, and behaviors that support the principles and practice of QI<br>Competency in QI methods and tools<br>Alignment of QI activities with the organizations priorities<br>Management structures and systems that support QI, including appropriate data and analysis systems.<br>Leadership support for QI at all levels.<br>Ability to work as a team (team performance), team member participation,<br>Presence of a champion<br>Physician support and participation,<br>team members technical competence,<br>training in theory, methods, and tools,<br>support to facilitate implementation and use,<br>the nature and complexity of the targeted change |
| de Souza LB, Pidd M. 2011                      | Review 90 articles                           | Lean. Case studies.                                      | Success factors                                                          | Clarify the nature of lean healthcare,<br>provide evidence that it works,<br>focus on patient processes,<br>translate it,<br>make a culture,<br>data – evidence based,<br>continuous improvement,<br>multidisciplinary teams across silos,<br>local performance measurement,<br>technical support,<br>success stories (small pilots)                                                                                                                                                                                                                                                                                                                                             |
| Kaplan HC, Provost LP, Froehle CM, et al. 2012 | 10 QI-experts identification based on review | QI, including Lean. Qualitative and quantitative studies | Contextual factors influencing QI success                                | External motivators (environmental pressure and incentives)<br>Project sponsorship (personnel, expertise, facilities from outside)<br>QI leadership (senior management board)<br>Senior leader project sponsor (to champion and support)<br>Culture support<br>Program maturity/sophistication of QI<br>Data infrastructure<br>Resource availability<br>Workforce QI focus/training/engaged<br>Micro system leadership (personally involved)<br>Culture support; teamwork, communication, freedom to improve<br>Capability (team ability to use QI methods)<br>Motivation/willingness<br>Team diversity<br>Physician involvement<br>Expert (subject matter)                      |

1  
2  
3  
4  
5  
6  
7  
8  
9  
10  
11  
12  
13  
14  
15  
16  
17  
18  
19  
20  
21  
22  
23  
24  
25  
26  
27  
28  
29  
30  
31  
32  
33  
34  
35  
36  
37  
38  
39  
40  
41  
42  
43  
44  
45  
46  
47  
48  
49

|                                               |                                  |                                                                       |                                                                                        |                                                                                                                                                                                                                                                                                                                                                                                                                                                            |
|-----------------------------------------------|----------------------------------|-----------------------------------------------------------------------|----------------------------------------------------------------------------------------|------------------------------------------------------------------------------------------------------------------------------------------------------------------------------------------------------------------------------------------------------------------------------------------------------------------------------------------------------------------------------------------------------------------------------------------------------------|
|                                               |                                  |                                                                       |                                                                                        | <ul style="list-style-type: none"> <li>Team tenure (worked as a team before)</li> <li>Prior QI experience</li> <li>Team leadership</li> <li>Team decision making processes</li> <li>Team norms of behavior</li> <li>Team QI skills</li> <li>Trigger (a specific event stimulates a new emphasis)</li> <li>Tasks strategic importance to the organization</li> </ul>                                                                                        |
| Kaplan HC, Brady PW, Dritz MC, et al 2010     | Review 47 articles               | QI including Lean. Observation, controlled design, meta-analysis.     | Factors important for QI success                                                       | <ul style="list-style-type: none"> <li>Leadership from top management/board</li> <li>Organizational culture</li> <li>Organizational structure (clinical integration across departments)</li> <li>Data infrastructure and information systems</li> <li>Years involved in QI (experience)</li> <li>Customer focus</li> <li>Physician involvement</li> <li>Micro system motivation to change</li> <li>Resources for QI</li> <li>QI team leadership</li> </ul> |
| Mazzocato P, Savage C, Brommels M et al. 2010 | review 33 articles               | Lean. Qualitative and quantitative.                                   | Contextual characteristics of relevance                                                | <ul style="list-style-type: none"> <li>Senior management involvement</li> <li>Work across functional divides</li> <li>Pursue value creation for patients</li> <li>Nurture long term holistic culture of CQI</li> <li>A need to improve</li> <li>A willingness to improve</li> </ul>                                                                                                                                                                        |
| Kim CS, Spahlinger DA, Kin JM et al. 2009     | UMHS-USA evaluasjon              | Lean. Qualitative and quantitative.                                   | Key factors                                                                            | <ul style="list-style-type: none"> <li>Expert guidance for initial efforts</li> <li>leadership - clinical champions and senior management support</li> <li>frontline worker engagement in the QI processes</li> <li>Use metrics to develop and track interventions</li> <li>Define a realistic project scope</li> </ul>                                                                                                                                    |
| Lukas CVD, Holmes SK, Cohen AB et al. 2007    | 12 healthcare system doc. review | QI including Lean Longitudinal case-studies, mixed method evaluation. | Interactive elements that appear critical to successful transformation of patient care | <ul style="list-style-type: none"> <li>Impetus to transform leadership commitment</li> <li>Actively engage staff in meaningful problem solving</li> <li>Alignment to achieve consistency of organization goals</li> <li>Integration to bridge traditional intra-organizational boundaries among individual components.</li> </ul>                                                                                                                          |
| Kollberg B, Dahlgaard JJ, Brehmer PO. 2007    | Unsystematic review              | QI including Lean. Qualitative and quantitative.                      | Critical success factors                                                               | <ul style="list-style-type: none"> <li>patient focus</li> <li>active involvement and multi-skilled teams</li> </ul>                                                                                                                                                                                                                                                                                                                                        |



|                                         |                                                        |                                                                                   |                                                          |                                                                                                                                                                                                                                                                                                        |
|-----------------------------------------|--------------------------------------------------------|-----------------------------------------------------------------------------------|----------------------------------------------------------|--------------------------------------------------------------------------------------------------------------------------------------------------------------------------------------------------------------------------------------------------------------------------------------------------------|
|                                         |                                                        |                                                                                   |                                                          |                                                                                                                                                                                                                                                                                                        |
| Radnor ZJ, Holweg M, Waring J. 2012     | 4 multilevel studies NHS                               | Lean. Case studies including interviews                                           | -                                                        | holistic system approach, Understanding pathways across the organization. a culture of continuous QI, structured problem solving, understanding the underlying assumptions                                                                                                                             |
| Walshe K. 2009                          | Unsystematic review                                    | Lean Theoretical, qualitative and quantitative studies                            | -                                                        | Adoption of a QI method, stick with it; develop skills and experience, build up engagement, commitment Organizational capacity.                                                                                                                                                                        |
| Walshe K, Freeman T. 2002               | unsystematic review                                    | Lean. Research evaluations.                                                       | The determinants of effectiveness                        | Leadership, direction, culture, training, resources, Practical support.                                                                                                                                                                                                                                |
| Winch S, Henderson AJ. 2009             | Un-systematic review                                   | Lean. Qualitative and quantitative.                                               | -                                                        | teamwork, collaboration between health professionals and patients, Communication.                                                                                                                                                                                                                      |
| Øvretveit J, Gustafson D. 2002          | Un-systematic review and recommendation for evaluation | QI including Lean. Theoretical, qualitative and quantitative.                     | Conditions for effectiveness or critical success factors | Senior management commitment, sustained attention, the right type of management roles at different levels, focus on customer needs, physician involvement, sufficient resources, careful program management, practical and relevant training which personnel can use immediately, the right culture    |
| Morrow E, Robert G, Maben J et al. 2012 | Evaluation program NHS                                 | Productive ward (Lean). Mixed method evaluation including interviews and surveys. | Key facilitators                                         | Regional level support<br>Alignment with organizational targets<br>Clear vision, good information about the initiative<br>Dedicated project leadership<br>Strong support from senior staff (champions/steering groups)<br>External support (facilitation, networks)<br>Enthusiasm from middle managers |

1  
2  
3  
4  
5  
6  
7  
8  
9  
10  
11  
12  
13  
14  
15  
16  
17  
18  
19  
20  
21  
22  
23  
24  
25  
26  
27  
28  
29  
30  
31  
32  
33  
34  
35  
36  
37  
38  
39  
40  
41  
42  
43  
44  
45  
46  
47  
48  
49

|                                  |                     |                                     |                   |                                                                                                                                                                                                                                                                                                                                                                                                                                                         |
|----------------------------------|---------------------|-------------------------------------|-------------------|---------------------------------------------------------------------------------------------------------------------------------------------------------------------------------------------------------------------------------------------------------------------------------------------------------------------------------------------------------------------------------------------------------------------------------------------------------|
|                                  |                     |                                     |                   | <ul style="list-style-type: none"> <li>Communication and feedback to staff and patients</li> <li>Need for change, valuing the initiative</li> <li>Simple, practical solutions to real problems</li> <li>Accessibility of recourses and teaching modules</li> <li>Self-nomination (units to take part)</li> <li>Local ownership and empowerment</li> <li>Sufficient resources, support and time (staff cover)</li> </ul>                                 |
| Kim CS, MBA, DAS, Billi JE. 2009 | Unsystematic review | Lean. Qualitative and quantitative. | Critical Elements | <ul style="list-style-type: none"> <li>Senior management support.</li> <li>Expert guidance for their initial projects.</li> <li>A well-structured set of metrics, on a regular basis, readjusted</li> <li>Aligning individual goals, projects, and metrics</li> <li>Provide flexibility for frontline workers to experiment at the site and time they identify a problem.</li> <li>Frontline management need to avail themselves to the area</li> </ul> |



# PRISMA 2009 Checklist

| Section/topic                      | #  | Checklist item                                                                                                                                                                                                                                                                                              | Reported on page # |
|------------------------------------|----|-------------------------------------------------------------------------------------------------------------------------------------------------------------------------------------------------------------------------------------------------------------------------------------------------------------|--------------------|
| <b>TITLE</b>                       |    |                                                                                                                                                                                                                                                                                                             |                    |
| Title                              | 1  | Identify the report as a systematic review, meta-analysis, or both.                                                                                                                                                                                                                                         | 1                  |
| <b>ABSTRACT</b>                    |    |                                                                                                                                                                                                                                                                                                             |                    |
| Structured summary                 | 2  | Provide a structured summary including, as applicable: background; objectives; data sources; study eligibility criteria, participants, and interventions; study appraisal and synthesis methods; results; limitations; conclusions and implications of key findings; systematic review registration number. | 3                  |
| <b>INTRODUCTION</b>                |    |                                                                                                                                                                                                                                                                                                             |                    |
| Rationale                          | 3  | Describe the rationale for the review in the context of what is already known.                                                                                                                                                                                                                              | 1                  |
| Objectives                         | 4  | Provide an explicit statement of questions being addressed with reference to participants, interventions, comparisons, outcomes, and study design (PICOS).                                                                                                                                                  | 3                  |
| <b>METHODS</b>                     |    |                                                                                                                                                                                                                                                                                                             |                    |
| Protocol and registration          | 5  | Indicate if a review protocol exists, if and where it can be accessed (e.g., Web address), and, if available, provide registration information including registration number.                                                                                                                               | 4                  |
| Eligibility criteria               | 6  | Specify study characteristics (e.g., PICOS, length of follow-up) and report characteristics (e.g., years considered, language, publication status) used as criteria for eligibility, giving rationale.                                                                                                      | App1               |
| Information sources                | 7  | Describe all information sources (e.g., databases with dates of coverage, contact with study authors to identify additional studies) in the search and date last searched.                                                                                                                                  | 3                  |
| Search                             | 8  | Present full electronic search strategy for at least one database, including any limits used, such that it could be repeated.                                                                                                                                                                               | App1               |
| Study selection                    | 9  | State the process for selecting studies (i.e., screening, eligibility, included in systematic review, and, if applicable, included in the meta-analysis).                                                                                                                                                   | App1               |
| Data collection process            | 10 | Describe method of data extraction from reports (e.g., piloted forms, independently, in duplicate) and any processes for obtaining and confirming data from investigators.                                                                                                                                  | 4                  |
| Data items                         | 11 | List and define all variables for which data were sought (e.g., PICOS, funding sources) and any assumptions and simplifications made.                                                                                                                                                                       | 3                  |
| Risk of bias in individual studies | 12 | Describe methods used for assessing risk of bias of individual studies (including specification of whether this was done at the study or outcome level), and how this information is to be used in any data synthesis.                                                                                      | 12                 |
| Summary measures                   | 13 | State the principal summary measures (e.g., risk ratio, difference in means).                                                                                                                                                                                                                               | 4                  |
| Synthesis of results               | 14 | Describe the methods of handling data and combining results of studies, if done, including measures of consistency (e.g., $I^2$ for each meta-analysis)                                                                                                                                                     | 12                 |



## PRISMA 2009 Checklist

Page 1 of 2

| Section/topic                 | #  | Checklist item                                                                                                                                                                                           | Reported on page # |
|-------------------------------|----|----------------------------------------------------------------------------------------------------------------------------------------------------------------------------------------------------------|--------------------|
| Risk of bias across studies   | 15 | Specify any assessment of risk of bias that may affect the cumulative evidence (e.g., publication bias, selective reporting within studies).                                                             | 12                 |
| Additional analyses           | 16 | Describe methods of additional analyses (e.g., sensitivity or subgroup analyses, meta-regression), if done, indicating which were pre-specified.                                                         | 4                  |
| <b>RESULTS</b>                |    |                                                                                                                                                                                                          |                    |
| Study selection               | 17 | Give numbers of studies screened, assessed for eligibility, and included in the review, with reasons for exclusions at each stage, ideally with a flow diagram.                                          | App1, 2            |
| Study characteristics         | 18 | For each study, present characteristics for which data were extracted (e.g., study size, PICOS, follow-up period) and provide the citations.                                                             | App2               |
| Risk of bias within studies   | 19 | Present data on risk of bias of each study and, if available, any outcome level assessment (see item 12).                                                                                                | 12                 |
| Results of individual studies | 20 | For all outcomes considered (benefits or harms), present, for each study: (a) simple summary data for each intervention group (b) effect estimates and confidence intervals, ideally with a forest plot. | -                  |
| Synthesis of results          | 21 | Present results of each meta-analysis done, including confidence intervals and measures of consistency.                                                                                                  | -                  |
| Risk of bias across studies   | 22 | Present results of any assessment of risk of bias across studies (see Item 15).                                                                                                                          | 12                 |
| Additional analysis           | 23 | Give results of additional analyses, if done (e.g., sensitivity or subgroup analyses, meta-regression [see Item 16]).                                                                                    | -                  |
| <b>DISCUSSION</b>             |    |                                                                                                                                                                                                          |                    |
| Summary of evidence           | 24 | Summarize the main findings including the strength of evidence for each main outcome; consider their relevance to key groups (e.g., healthcare providers, users, and policy makers).                     | 12                 |
| Limitations                   | 25 | Discuss limitations at study and outcome level (e.g., risk of bias), and at review-level (e.g., incomplete retrieval of identified research, reporting bias).                                            | 12                 |
| Conclusions                   | 26 | Provide a general interpretation of the results in the context of other evidence, and implications for future research.                                                                                  | 13                 |
| <b>FUNDING</b>                |    |                                                                                                                                                                                                          |                    |
| Funding                       | 27 | Describe sources of funding for the systematic review and other support (e.g., supply of data); role of funders for the systematic review.                                                               | 14                 |

From: Moher D, Liberati A, Tetzlaff J, Altman DG, The PRISMA Group (2009). Preferred Reporting Items for Systematic Reviews and Meta-Analyses: The PRISMA Statement. PLoS Med 6(6): e1000097. doi:10.1371/journal.pmed1000097

For more information, visit: [www.prisma-statement.org](http://www.prisma-statement.org).

Page 2 of 2  
For peer review only - <http://bmjopen.bmj.com/site/about/guidelines.xhtml>
