# Supplementary figures and images for: Lean thinking in hospitals: is there a cure for the absence of evidence? A systematic review of reviews
Source: HighWire-hosted journal article supplement (doi:10.1136/bmjopen-2013-003873), 2014-01-01

Appendix 1. Flow chart, detailed search strategy (Web only)

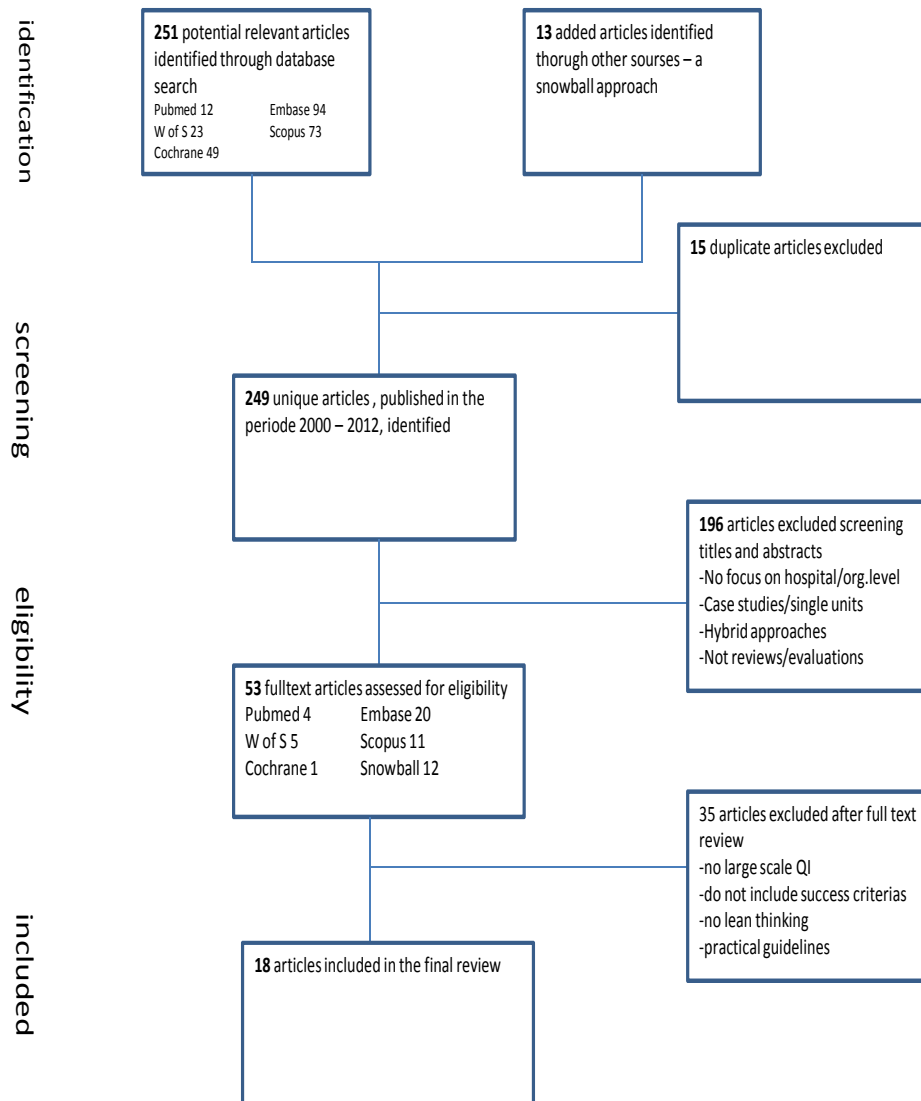

Supplement: bmjopen-2013-003873supp_appendix1.pdf [file bmjopen-2013-003873supp_appendix1.pdf]
